# Supplementary material for: Integrated into Environmental Biofilm Chromobacterium Vaccinii Survives Winter with Support of Bacterial Community
Source: Preprints.org preprint supplement (doi:10.20944/preprints202009.0273.v1), 2020-09-12
Supplement: Supplementary file 1 [file Supplementary_Table2.xlsx]

## Sheet: SmallMolecule_mass
CFU number	Target mass	Weight	Species
61	254.17	0.0144928	Chromobacterium vaccinii
63	254.17	0.0144928	Chromobacterium vaccinii
145	254.17	0.0144928	Chromobacterium vaccinii
146	254.17	0.0144928	Chromobacterium vaccinii
189	254.17	0.0144928	Chromobacterium vaccinii
190	254.17	0.0144928	Chromobacterium vaccinii
192	254.17	0.0144928	Chromobacterium vaccinii
61	714.22	0.0144928	Chromobacterium vaccinii
63	714.22	0.0144928	Chromobacterium vaccinii
145	714.22	0.0144928	Chromobacterium vaccinii
146	714.22	0.0144928	Chromobacterium vaccinii
189	714.22	0.0144928	Chromobacterium vaccinii
190	714.22	0.0144928	Chromobacterium vaccinii
192	714.22	0.0144928	Chromobacterium vaccinii
61	715.23	0.0144928	Chromobacterium vaccinii
63	715.23	0.0144928	Chromobacterium vaccinii
145	715.23	0.0144928	Chromobacterium vaccinii
146	715.23	0.0144928	Chromobacterium vaccinii
189	715.23	0.0144928	Chromobacterium vaccinii
190	715.23	0.0144928	Chromobacterium vaccinii
192	715.23	0.0144928	Chromobacterium vaccinii
61	428.04	0.0151515	Chromobacterium vaccinii
63	428.04	0.0151515	Chromobacterium vaccinii
145	428.04	0.0151515	Chromobacterium vaccinii
146	428.04	0.0151515	Chromobacterium vaccinii
189	428.04	0.0151515	Chromobacterium vaccinii
190	428.04	0.0151515	Chromobacterium vaccinii
192	428.04	0.0151515	Chromobacterium vaccinii
61	716.23	0.0151515	Chromobacterium vaccinii
63	716.23	0.0151515	Chromobacterium vaccinii
145	716.23	0.0151515	Chromobacterium vaccinii
146	716.23	0.0151515	Chromobacterium vaccinii
189	716.23	0.0151515	Chromobacterium vaccinii
190	716.23	0.0151515	Chromobacterium vaccinii
192	716.23	0.0151515	Chromobacterium vaccinii
61	348.08	0.015873	Chromobacterium vaccinii
63	348.08	0.015873	Chromobacterium vaccinii
145	348.08	0.015873	Chromobacterium vaccinii
146	348.08	0.015873	Chromobacterium vaccinii
189	348.08	0.015873	Chromobacterium vaccinii
190	348.08	0.015873	Chromobacterium vaccinii
192	348.08	0.015873	Chromobacterium vaccinii
61	458.12	0.016129	Chromobacterium vaccinii
63	458.12	0.016129	Chromobacterium vaccinii
145	458.12	0.016129	Chromobacterium vaccinii
146	458.12	0.016129	Chromobacterium vaccinii
189	458.12	0.016129	Chromobacterium vaccinii
190	458.12	0.016129	Chromobacterium vaccinii
192	458.12	0.016129	Chromobacterium vaccinii
61	440.11	0.0163934	Chromobacterium vaccinii
63	440.11	0.0163934	Chromobacterium vaccinii
145	440.11	0.0163934	Chromobacterium vaccinii
146	440.11	0.0163934	Chromobacterium vaccinii
189	440.11	0.0163934	Chromobacterium vaccinii
190	440.11	0.0163934	Chromobacterium vaccinii
192	440.11	0.0163934	Chromobacterium vaccinii
61	655.26	0.0163934	Chromobacterium vaccinii
63	655.26	0.0163934	Chromobacterium vaccinii
189	655.26	0.0163934	Chromobacterium vaccinii
190	655.26	0.0163934	Chromobacterium vaccinii
192	655.26	0.0163934	Chromobacterium vaccinii
61	670.24	0.0166667	Chromobacterium vaccinii
63	670.24	0.0166667	Chromobacterium vaccinii
145	670.24	0.0166667	Chromobacterium vaccinii
146	670.24	0.0166667	Chromobacterium vaccinii
189	670.24	0.0166667	Chromobacterium vaccinii
190	670.24	0.0166667	Chromobacterium vaccinii
192	670.24	0.0166667	Chromobacterium vaccinii
61	235.12	0.0172414	Chromobacterium vaccinii
63	235.12	0.0172414	Chromobacterium vaccinii
145	235.12	0.0172414	Chromobacterium vaccinii
146	235.12	0.0172414	Chromobacterium vaccinii
189	235.12	0.0172414	Chromobacterium vaccinii
190	235.12	0.0172414	Chromobacterium vaccinii
192	235.12	0.0172414	Chromobacterium vaccinii
61	448.48	0.0172414	Chromobacterium vaccinii
63	448.48	0.0172414	Chromobacterium vaccinii
145	448.48	0.0172414	Chromobacterium vaccinii
146	448.48	0.0172414	Chromobacterium vaccinii
192	448.48	0.0172414	Chromobacterium vaccinii
61	657.27	0.0175439	Chromobacterium vaccinii
63	657.27	0.0175439	Chromobacterium vaccinii
189	657.27	0.0175439	Chromobacterium vaccinii
190	657.27	0.0175439	Chromobacterium vaccinii
192	657.27	0.0175439	Chromobacterium vaccinii
61	843.25	0.0175439	Chromobacterium vaccinii
63	843.25	0.0175439	Chromobacterium vaccinii
145	843.25	0.0175439	Chromobacterium vaccinii
146	843.25	0.0175439	Chromobacterium vaccinii
189	843.25	0.0175439	Chromobacterium vaccinii
190	843.25	0.0175439	Chromobacterium vaccinii
192	843.25	0.0175439	Chromobacterium vaccinii
61	255.17	0.0178571	Chromobacterium vaccinii
63	255.17	0.0178571	Chromobacterium vaccinii
145	255.17	0.0178571	Chromobacterium vaccinii
146	255.17	0.0178571	Chromobacterium vaccinii
189	255.17	0.0178571	Chromobacterium vaccinii
190	255.17	0.0178571	Chromobacterium vaccinii
192	255.17	0.0178571	Chromobacterium vaccinii
61	750.42	0.0188679	Chromobacterium vaccinii
63	750.42	0.0188679	Chromobacterium vaccinii
145	750.42	0.0188679	Chromobacterium vaccinii
189	750.42	0.0188679	Chromobacterium vaccinii
190	750.42	0.0188679	Chromobacterium vaccinii
192	750.42	0.0188679	Chromobacterium vaccinii
61	526.9	0.0192308	Chromobacterium vaccinii
63	526.9	0.0192308	Chromobacterium vaccinii
145	526.9	0.0192308	Chromobacterium vaccinii
61	656.27	0.0192308	Chromobacterium vaccinii
63	656.27	0.0192308	Chromobacterium vaccinii
189	656.27	0.0192308	Chromobacterium vaccinii
190	656.27	0.0192308	Chromobacterium vaccinii
192	656.27	0.0192308	Chromobacterium vaccinii
61	671.25	0.0192308	Chromobacterium vaccinii
63	671.25	0.0192308	Chromobacterium vaccinii
145	671.25	0.0192308	Chromobacterium vaccinii
146	671.25	0.0192308	Chromobacterium vaccinii
189	671.25	0.0192308	Chromobacterium vaccinii
190	671.25	0.0192308	Chromobacterium vaccinii
192	671.25	0.0192308	Chromobacterium vaccinii
61	549.48	0.0196078	Chromobacterium vaccinii
63	549.48	0.0196078	Chromobacterium vaccinii
145	549.48	0.0196078	Chromobacterium vaccinii
189	549.48	0.0196078	Chromobacterium vaccinii
190	549.48	0.0196078	Chromobacterium vaccinii
192	549.48	0.0196078	Chromobacterium vaccinii
61	542.08	0.02	Chromobacterium vaccinii
63	542.08	0.02	Chromobacterium vaccinii
145	542.08	0.02	Chromobacterium vaccinii
61	616.16	0.02	Chromobacterium vaccinii
63	616.16	0.02	Chromobacterium vaccinii
189	616.16	0.02	Chromobacterium vaccinii
190	616.16	0.02	Chromobacterium vaccinii
192	616.16	0.02	Chromobacterium vaccinii
61	668.22	0.0204082	Chromobacterium vaccinii
63	668.22	0.0204082	Chromobacterium vaccinii
145	668.22	0.0204082	Chromobacterium vaccinii
146	668.22	0.0204082	Chromobacterium vaccinii
189	668.22	0.0204082	Chromobacterium vaccinii
190	668.22	0.0204082	Chromobacterium vaccinii
192	668.22	0.0204082	Chromobacterium vaccinii
145	1152.58	0.0204082	Chromobacterium vaccinii
146	1152.58	0.0204082	Chromobacterium vaccinii
190	1152.58	0.0204082	Chromobacterium vaccinii
192	1152.58	0.0204082	Chromobacterium vaccinii
61	658.27	0.0212766	Chromobacterium vaccinii
189	658.27	0.0212766	Chromobacterium vaccinii
190	658.27	0.0212766	Chromobacterium vaccinii
192	658.27	0.0212766	Chromobacterium vaccinii
61	717.23	0.0212766	Chromobacterium vaccinii
63	717.23	0.0212766	Chromobacterium vaccinii
145	717.23	0.0212766	Chromobacterium vaccinii
146	717.23	0.0212766	Chromobacterium vaccinii
189	717.23	0.0212766	Chromobacterium vaccinii
190	717.23	0.0212766	Chromobacterium vaccinii
192	717.23	0.0212766	Chromobacterium vaccinii
61	585.19	0.0222222	Chromobacterium vaccinii
63	585.19	0.0222222	Chromobacterium vaccinii
145	585.19	0.0222222	Chromobacterium vaccinii
146	585.19	0.0222222	Chromobacterium vaccinii
189	585.19	0.0222222	Chromobacterium vaccinii
190	585.19	0.0222222	Chromobacterium vaccinii
192	585.19	0.0222222	Chromobacterium vaccinii
61	844.24	0.0232558	Chromobacterium vaccinii
63	844.24	0.0232558	Chromobacterium vaccinii
145	844.24	0.0232558	Chromobacterium vaccinii
146	844.24	0.0232558	Chromobacterium vaccinii
189	844.24	0.0232558	Chromobacterium vaccinii
190	844.24	0.0232558	Chromobacterium vaccinii
192	844.24	0.0232558	Chromobacterium vaccinii
61	654.24	0.0243902	Chromobacterium vaccinii
189	654.24	0.0243902	Chromobacterium vaccinii
190	654.24	0.0243902	Chromobacterium vaccinii
192	654.24	0.0243902	Chromobacterium vaccinii
145	608.06	0.025	Chromobacterium vaccinii
146	608.06	0.025	Chromobacterium vaccinii
189	608.06	0.025	Chromobacterium vaccinii
190	608.06	0.025	Chromobacterium vaccinii
192	608.06	0.025	Chromobacterium vaccinii
61	563.6	0.025641	Chromobacterium vaccinii
63	563.6	0.025641	Chromobacterium vaccinii
145	563.6	0.025641	Chromobacterium vaccinii
146	563.6	0.025641	Chromobacterium vaccinii
145	441.05	0.0263158	Chromobacterium vaccinii
146	441.05	0.0263158	Chromobacterium vaccinii
61	677.43	0.0263158	Chromobacterium vaccinii
145	677.43	0.0263158	Chromobacterium vaccinii
146	677.43	0.0263158	Chromobacterium vaccinii
189	677.43	0.0263158	Chromobacterium vaccinii
190	677.43	0.0263158	Chromobacterium vaccinii
192	677.43	0.0263158	Chromobacterium vaccinii
61	734.44	0.027027	Chromobacterium vaccinii
63	734.44	0.027027	Chromobacterium vaccinii
189	734.44	0.027027	Chromobacterium vaccinii
190	734.44	0.027027	Chromobacterium vaccinii
192	734.44	0.027027	Chromobacterium vaccinii
61	251	0.0277778	Chromobacterium vaccinii
63	251	0.0277778	Chromobacterium vaccinii
61	609.24	0.0277778	Chromobacterium vaccinii
189	609.24	0.0277778	Chromobacterium vaccinii
190	609.24	0.0277778	Chromobacterium vaccinii
192	609.24	0.0277778	Chromobacterium vaccinii
61	669.22	0.0277778	Chromobacterium vaccinii
63	669.22	0.0277778	Chromobacterium vaccinii
146	669.22	0.0277778	Chromobacterium vaccinii
189	669.22	0.0277778	Chromobacterium vaccinii
192	669.22	0.0277778	Chromobacterium vaccinii
61	751.4	0.0277778	Chromobacterium vaccinii
63	751.4	0.0277778	Chromobacterium vaccinii
61	610.25	0.0285714	Chromobacterium vaccinii
189	610.25	0.0285714	Chromobacterium vaccinii
190	610.25	0.0285714	Chromobacterium vaccinii
192	610.25	0.0285714	Chromobacterium vaccinii
61	611.26	0.0285714	Chromobacterium vaccinii
189	611.26	0.0285714	Chromobacterium vaccinii
190	611.26	0.0285714	Chromobacterium vaccinii
192	611.26	0.0285714	Chromobacterium vaccinii
61	211.13	0.0294118	Chromobacterium vaccinii
63	211.13	0.0294118	Chromobacterium vaccinii
145	211.13	0.0294118	Chromobacterium vaccinii
146	211.13	0.0294118	Chromobacterium vaccinii
189	211.13	0.0294118	Chromobacterium vaccinii
190	211.13	0.0294118	Chromobacterium vaccinii
192	211.13	0.0294118	Chromobacterium vaccinii
61	617.16	0.0294118	Chromobacterium vaccinii
63	617.16	0.0294118	Chromobacterium vaccinii
189	617.16	0.0294118	Chromobacterium vaccinii
190	617.16	0.0294118	Chromobacterium vaccinii
192	617.16	0.0294118	Chromobacterium vaccinii
61	1173.53	0.0294118	Chromobacterium vaccinii
145	1173.53	0.0294118	Chromobacterium vaccinii
146	1173.53	0.0294118	Chromobacterium vaccinii
189	1173.53	0.0294118	Chromobacterium vaccinii
190	1173.53	0.0294118	Chromobacterium vaccinii
192	1173.53	0.0294118	Chromobacterium vaccinii
189	673.23	0.030303	Chromobacterium vaccinii
190	673.23	0.030303	Chromobacterium vaccinii
61	282.22	0.03125	Chromobacterium vaccinii
63	282.22	0.03125	Chromobacterium vaccinii
145	282.22	0.03125	Chromobacterium vaccinii
146	282.22	0.03125	Chromobacterium vaccinii
189	282.22	0.03125	Chromobacterium vaccinii
190	282.22	0.03125	Chromobacterium vaccinii
192	282.22	0.03125	Chromobacterium vaccinii
189	1243.59	0.03125	Chromobacterium vaccinii
190	1243.59	0.03125	Chromobacterium vaccinii
189	672.25	0.0322581	Chromobacterium vaccinii
190	672.25	0.0322581	Chromobacterium vaccinii
61	1174.53	0.0322581	Chromobacterium vaccinii
145	1174.53	0.0322581	Chromobacterium vaccinii
146	1174.53	0.0322581	Chromobacterium vaccinii
192	1174.53	0.0322581	Chromobacterium vaccinii
145	262.1	0.0344828	Chromobacterium vaccinii
146	262.1	0.0344828	Chromobacterium vaccinii
189	262.1	0.0344828	Chromobacterium vaccinii
190	262.1	0.0344828	Chromobacterium vaccinii
145	313.15	0.0344828	Chromobacterium vaccinii
146	313.15	0.0344828	Chromobacterium vaccinii
61	766.41	0.0344828	Chromobacterium vaccinii
63	766.41	0.0344828	Chromobacterium vaccinii
145	1190.61	0.0344828	Chromobacterium vaccinii
61	1265.57	0.0344828	Chromobacterium vaccinii
61	1875.92	0.0344828	Chromobacterium vaccinii
63	1875.92	0.0344828	Chromobacterium vaccinii
189	1875.92	0.0344828	Chromobacterium vaccinii
190	1875.92	0.0344828	Chromobacterium vaccinii
192	1875.92	0.0344828	Chromobacterium vaccinii
61	586.18	0.0357143	Chromobacterium vaccinii
63	586.18	0.0357143	Chromobacterium vaccinii
145	586.18	0.0357143	Chromobacterium vaccinii
146	586.18	0.0357143	Chromobacterium vaccinii
189	586.18	0.0357143	Chromobacterium vaccinii
190	586.18	0.0357143	Chromobacterium vaccinii
192	586.18	0.0357143	Chromobacterium vaccinii
189	660.28	0.0357143	Chromobacterium vaccinii
190	660.28	0.0357143	Chromobacterium vaccinii
61	1189.56	0.0357143	Chromobacterium vaccinii
145	1189.56	0.0357143	Chromobacterium vaccinii
61	1872.93	0.0357143	Chromobacterium vaccinii
189	1872.93	0.0357143	Chromobacterium vaccinii
190	1872.93	0.0357143	Chromobacterium vaccinii
192	1872.93	0.0357143	Chromobacterium vaccinii
61	1873.94	0.0357143	Chromobacterium vaccinii
189	1873.94	0.0357143	Chromobacterium vaccinii
190	1873.94	0.0357143	Chromobacterium vaccinii
192	1873.94	0.0357143	Chromobacterium vaccinii
189	689.25	0.037037	Chromobacterium vaccinii
61	1722.97	0.037037	Chromobacterium vaccinii
189	1722.97	0.037037	Chromobacterium vaccinii
190	1722.97	0.037037	Chromobacterium vaccinii
192	1722.97	0.037037	Chromobacterium vaccinii
189	1745.94	0.037037	Chromobacterium vaccinii
190	1745.94	0.037037	Chromobacterium vaccinii
192	1745.94	0.037037	Chromobacterium vaccinii
61	1851.97	0.037037	Chromobacterium vaccinii
189	1851.97	0.037037	Chromobacterium vaccinii
190	1851.97	0.037037	Chromobacterium vaccinii
192	1851.97	0.037037	Chromobacterium vaccinii
63	251.99	0.0384615	Chromobacterium vaccinii
189	304.3	0.0384615	Chromobacterium vaccinii
190	304.3	0.0384615	Chromobacterium vaccinii
192	304.3	0.0384615	Chromobacterium vaccinii
189	1244.63	0.0384615	Chromobacterium vaccinii
190	1244.63	0.0384615	Chromobacterium vaccinii
61	1851	0.0384615	Chromobacterium vaccinii
189	1851	0.0384615	Chromobacterium vaccinii
190	1851	0.0384615	Chromobacterium vaccinii
61	1874.94	0.0384615	Chromobacterium vaccinii
63	1874.94	0.0384615	Chromobacterium vaccinii
189	1874.94	0.0384615	Chromobacterium vaccinii
190	1874.94	0.0384615	Chromobacterium vaccinii
192	1874.94	0.0384615	Chromobacterium vaccinii
189	1877.94	0.0384615	Chromobacterium vaccinii
190	1877.94	0.0384615	Chromobacterium vaccinii
192	1877.94	0.0384615	Chromobacterium vaccinii
61	1891.91	0.0384615	Chromobacterium vaccinii
63	1891.91	0.0384615	Chromobacterium vaccinii
189	1891.91	0.0384615	Chromobacterium vaccinii
190	1891.91	0.0384615	Chromobacterium vaccinii
63	477	0.04	Chromobacterium vaccinii
189	1744.93	0.04	Chromobacterium vaccinii
190	1744.93	0.04	Chromobacterium vaccinii
192	1744.93	0.04	Chromobacterium vaccinii
189	1760.92	0.04	Chromobacterium vaccinii
190	1760.92	0.04	Chromobacterium vaccinii
192	1760.92	0.04	Chromobacterium vaccinii
189	1853.97	0.04	Chromobacterium vaccinii
190	1853.97	0.04	Chromobacterium vaccinii
192	1853.97	0.04	Chromobacterium vaccinii
63	1876.92	0.04	Chromobacterium vaccinii
189	1876.92	0.04	Chromobacterium vaccinii
190	1876.92	0.04	Chromobacterium vaccinii
192	1876.92	0.04	Chromobacterium vaccinii
61	728.47	0.0416667	Chromobacterium vaccinii
63	728.47	0.0416667	Chromobacterium vaccinii
61	1723.94	0.0416667	Chromobacterium vaccinii
189	1723.94	0.0416667	Chromobacterium vaccinii
190	1723.94	0.0416667	Chromobacterium vaccinii
192	1723.94	0.0416667	Chromobacterium vaccinii
189	1878.91	0.0416667	Chromobacterium vaccinii
190	1878.91	0.0416667	Chromobacterium vaccinii
192	1878.91	0.0416667	Chromobacterium vaccinii
63	776.44	0.0434783	Chromobacterium vaccinii
189	1282.6	0.0434783	Chromobacterium vaccinii
189	1304.49	0.0434783	Chromobacterium vaccinii
190	1304.49	0.0434783	Chromobacterium vaccinii
63	1892.88	0.0434783	Chromobacterium vaccinii
189	1892.88	0.0434783	Chromobacterium vaccinii
190	1892.88	0.0434783	Chromobacterium vaccinii
192	1892.88	0.0434783	Chromobacterium vaccinii
189	1852.97	0.0454546	Chromobacterium vaccinii
190	1852.97	0.0454546	Chromobacterium vaccinii
192	1852.97	0.0454546	Chromobacterium vaccinii
61	1890.89	0.0454546	Chromobacterium vaccinii
63	1890.89	0.0454546	Chromobacterium vaccinii
189	1890.89	0.0454546	Chromobacterium vaccinii
190	1890.89	0.0454546	Chromobacterium vaccinii
61	456.14	0.0476191	Chromobacterium vaccinii
189	456.14	0.0476191	Chromobacterium vaccinii
190	456.14	0.0476191	Chromobacterium vaccinii
192	456.14	0.0476191	Chromobacterium vaccinii
63	781.43	0.0476191	Chromobacterium vaccinii
189	1245.63	0.0476191	Chromobacterium vaccinii
190	1245.63	0.0476191	Chromobacterium vaccinii
189	1761.86	0.0476191	Chromobacterium vaccinii
190	1761.86	0.0476191	Chromobacterium vaccinii
192	1761.86	0.0476191	Chromobacterium vaccinii
61	1889.88	0.0476191	Chromobacterium vaccinii
189	1889.88	0.0476191	Chromobacterium vaccinii
190	1889.88	0.0476191	Chromobacterium vaccinii
61	754.49	0.05	Chromobacterium vaccinii
189	1305.51	0.05	Chromobacterium vaccinii
189	1724.96	0.05	Chromobacterium vaccinii
190	1724.96	0.05	Chromobacterium vaccinii
192	1724.96	0.05	Chromobacterium vaccinii
145	257.14	0.0526316	Chromobacterium vaccinii
146	257.14	0.0526316	Chromobacterium vaccinii
189	257.14	0.0526316	Chromobacterium vaccinii
190	257.14	0.0526316	Chromobacterium vaccinii
61	1590.78	0.0526316	Chromobacterium vaccinii
189	1590.78	0.0526316	Chromobacterium vaccinii
190	1590.78	0.0526316	Chromobacterium vaccinii
192	1590.78	0.0526316	Chromobacterium vaccinii
189	1879.89	0.0526316	Chromobacterium vaccinii
190	1879.89	0.0526316	Chromobacterium vaccinii
192	1879.89	0.0526316	Chromobacterium vaccinii
61	1888.9	0.0526316	Chromobacterium vaccinii
189	1888.9	0.0526316	Chromobacterium vaccinii
190	1888.9	0.0526316	Chromobacterium vaccinii
189	595.77	0.0555556	Chromobacterium vaccinii
189	1746.87	0.0555556	Chromobacterium vaccinii
190	1746.87	0.0555556	Chromobacterium vaccinii
192	1746.87	0.0555556	Chromobacterium vaccinii
189	1854.96	0.0555556	Chromobacterium vaccinii
190	1854.96	0.0555556	Chromobacterium vaccinii
61	712.51	0.0588235	Chromobacterium vaccinii
63	712.51	0.0588235	Chromobacterium vaccinii
189	712.51	0.0588235	Chromobacterium vaccinii
190	712.51	0.0588235	Chromobacterium vaccinii
192	712.51	0.0588235	Chromobacterium vaccinii
145	311.16	0.0625	Chromobacterium vaccinii
146	311.16	0.0625	Chromobacterium vaccinii
189	311.16	0.0625	Chromobacterium vaccinii
192	311.16	0.0625	Chromobacterium vaccinii
189	612.26	0.0625	Chromobacterium vaccinii
190	612.26	0.0625	Chromobacterium vaccinii
189	735.42	0.0625	Chromobacterium vaccinii
190	735.42	0.0625	Chromobacterium vaccinii
61	736.21	0.0625	Chromobacterium vaccinii
63	736.21	0.0625	Chromobacterium vaccinii
146	736.21	0.0625	Chromobacterium vaccinii
189	736.21	0.0625	Chromobacterium vaccinii
190	736.21	0.0625	Chromobacterium vaccinii
192	736.21	0.0625	Chromobacterium vaccinii
63	859.36	0.0625	Chromobacterium vaccinii
145	859.36	0.0625	Chromobacterium vaccinii
146	859.36	0.0625	Chromobacterium vaccinii
189	1455.56	0.0625	Chromobacterium vaccinii
190	1455.56	0.0625	Chromobacterium vaccinii
61	1738.93	0.0625	Chromobacterium vaccinii
189	1762.82	0.0625	Chromobacterium vaccinii
190	1762.82	0.0625	Chromobacterium vaccinii
192	1762.82	0.0625	Chromobacterium vaccinii
61	564.24	0.0666667	Chromobacterium vaccinii
63	564.24	0.0666667	Chromobacterium vaccinii
189	564.24	0.0666667	Chromobacterium vaccinii
190	564.24	0.0666667	Chromobacterium vaccinii
189	575.49	0.0666667	Chromobacterium vaccinii
192	575.49	0.0666667	Chromobacterium vaccinii
189	732.5	0.0666667	Chromobacterium vaccinii
189	798.26	0.0666667	Chromobacterium vaccinii
189	1591.78	0.0666667	Chromobacterium vaccinii
190	1591.78	0.0666667	Chromobacterium vaccinii
189	1607.67	0.0666667	Chromobacterium vaccinii
190	1607.67	0.0666667	Chromobacterium vaccinii
145	263.12	0.0714286	Chromobacterium vaccinii
146	263.12	0.0714286	Chromobacterium vaccinii
63	550.49	0.0714286	Chromobacterium vaccinii
189	550.49	0.0714286	Chromobacterium vaccinii
192	550.49	0.0714286	Chromobacterium vaccinii
189	699.22	0.0714286	Chromobacterium vaccinii
190	699.22	0.0714286	Chromobacterium vaccinii
63	730.35	0.0714286	Chromobacterium vaccinii
189	730.35	0.0714286	Chromobacterium vaccinii
190	730.35	0.0714286	Chromobacterium vaccinii
192	730.35	0.0714286	Chromobacterium vaccinii
61	1739.88	0.0714286	Chromobacterium vaccinii
189	1747.83	0.0714286	Chromobacterium vaccinii
190	1747.83	0.0714286	Chromobacterium vaccinii
192	1747.83	0.0714286	Chromobacterium vaccinii
189	1893.86	0.0714286	Chromobacterium vaccinii
190	1893.86	0.0714286	Chromobacterium vaccinii
145	345.17	0.0769231	Chromobacterium vaccinii
146	345.17	0.0769231	Chromobacterium vaccinii
189	1855.91	0.0769231	Chromobacterium vaccinii
190	1855.91	0.0769231	Chromobacterium vaccinii
145	330.08	0.0833333	Chromobacterium vaccinii
146	330.08	0.0833333	Chromobacterium vaccinii
61	563.24	0.0833333	Chromobacterium vaccinii
63	563.24	0.0833333	Chromobacterium vaccinii
189	563.24	0.0833333	Chromobacterium vaccinii
190	563.24	0.0833333	Chromobacterium vaccinii
63	748.45	0.0833333	Chromobacterium vaccinii
189	1456.67	0.0833333	Chromobacterium vaccinii
190	1456.67	0.0833333	Chromobacterium vaccinii
189	1472.72	0.0833333	Chromobacterium vaccinii
190	1472.72	0.0833333	Chromobacterium vaccinii
189	1725.85	0.0833333	Chromobacterium vaccinii
190	1725.85	0.0833333	Chromobacterium vaccinii
189	1982.98	0.0833333	Chromobacterium vaccinii
190	1982.98	0.0833333	Chromobacterium vaccinii
146	373.24	0.0909091	Chromobacterium vaccinii
189	760.44	0.0909091	Chromobacterium vaccinii
190	760.44	0.0909091	Chromobacterium vaccinii
189	1592.78	0.0909091	Chromobacterium vaccinii
190	1592.78	0.0909091	Chromobacterium vaccinii
190	1763.82	0.0909091	Chromobacterium vaccinii
189	1894.87	0.0909091	Chromobacterium vaccinii
190	1894.87	0.0909091	Chromobacterium vaccinii
61	470.37	0.1	Chromobacterium vaccinii
63	470.37	0.1	Chromobacterium vaccinii
189	583.22	0.1	Chromobacterium vaccinii
63	845.24	0.1	Chromobacterium vaccinii
145	845.24	0.1	Chromobacterium vaccinii
146	845.24	0.1	Chromobacterium vaccinii
189	845.24	0.1	Chromobacterium vaccinii
190	845.24	0.1	Chromobacterium vaccinii
189	1606.75	0.1	Chromobacterium vaccinii
190	1606.75	0.1	Chromobacterium vaccinii
189	1982.01	0.1	Chromobacterium vaccinii
190	1982.01	0.1	Chromobacterium vaccinii
61	204.09	0.111111	Chromobacterium vaccinii
63	204.09	0.111111	Chromobacterium vaccinii
189	204.09	0.111111	Chromobacterium vaccinii
190	204.09	0.111111	Chromobacterium vaccinii
192	204.09	0.111111	Chromobacterium vaccinii
145	327.12	0.111111	Chromobacterium vaccinii
146	327.12	0.111111	Chromobacterium vaccinii
189	327.12	0.111111	Chromobacterium vaccinii
190	327.12	0.111111	Chromobacterium vaccinii
192	327.12	0.111111	Chromobacterium vaccinii
190	457.13	0.111111	Chromobacterium vaccinii
189	618.06	0.111111	Chromobacterium vaccinii
192	618.06	0.111111	Chromobacterium vaccinii
61	921.17	0.111111	Chromobacterium vaccinii
63	921.17	0.111111	Chromobacterium vaccinii
145	921.17	0.111111	Chromobacterium vaccinii
146	921.17	0.111111	Chromobacterium vaccinii
189	921.17	0.111111	Chromobacterium vaccinii
190	921.17	0.111111	Chromobacterium vaccinii
192	921.17	0.111111	Chromobacterium vaccinii
189	1471.77	0.111111	Chromobacterium vaccinii
146	593.46	0.125	Chromobacterium vaccinii
189	743.24	0.125	Chromobacterium vaccinii
63	1322.6	0.125	Chromobacterium vaccinii
190	1473.75	0.125	Chromobacterium vaccinii
63	332.28	0.142857	Chromobacterium vaccinii
189	787.19	0.142857	Chromobacterium vaccinii
61	922.34	0.142857	Chromobacterium vaccinii
63	922.34	0.142857	Chromobacterium vaccinii
145	922.34	0.142857	Chromobacterium vaccinii
146	922.34	0.142857	Chromobacterium vaccinii
189	922.34	0.142857	Chromobacterium vaccinii
190	922.34	0.142857	Chromobacterium vaccinii
192	922.34	0.142857	Chromobacterium vaccinii
61	923.33	0.142857	Chromobacterium vaccinii
63	923.33	0.142857	Chromobacterium vaccinii
145	923.33	0.142857	Chromobacterium vaccinii
146	923.33	0.142857	Chromobacterium vaccinii
189	923.33	0.142857	Chromobacterium vaccinii
190	923.33	0.142857	Chromobacterium vaccinii
192	923.33	0.142857	Chromobacterium vaccinii
189	927.53	0.142857	Chromobacterium vaccinii
190	927.53	0.142857	Chromobacterium vaccinii
192	927.53	0.142857	Chromobacterium vaccinii
61	1718.88	0.142857	Chromobacterium vaccinii
189	1718.88	0.142857	Chromobacterium vaccinii
190	1718.88	0.142857	Chromobacterium vaccinii
61	1719.81	0.142857	Chromobacterium vaccinii
189	1719.81	0.142857	Chromobacterium vaccinii
190	1719.81	0.142857	Chromobacterium vaccinii
145	343.14	0.166667	Chromobacterium vaccinii
189	596.62	0.166667	Chromobacterium vaccinii
189	910.82	0.166667	Chromobacterium vaccinii
190	910.82	0.166667	Chromobacterium vaccinii
192	910.82	0.166667	Chromobacterium vaccinii
61	924.33	0.166667	Chromobacterium vaccinii
63	924.33	0.166667	Chromobacterium vaccinii
146	924.33	0.166667	Chromobacterium vaccinii
189	924.33	0.166667	Chromobacterium vaccinii
190	924.33	0.166667	Chromobacterium vaccinii
192	924.33	0.166667	Chromobacterium vaccinii
61	925.33	0.166667	Chromobacterium vaccinii
63	925.33	0.166667	Chromobacterium vaccinii
146	925.33	0.166667	Chromobacterium vaccinii
189	925.33	0.166667	Chromobacterium vaccinii
190	925.33	0.166667	Chromobacterium vaccinii
192	925.33	0.166667	Chromobacterium vaccinii
190	1608.76	0.166667	Chromobacterium vaccinii
61	273.16	0.2	Chromobacterium vaccinii
63	273.16	0.2	Chromobacterium vaccinii
189	273.16	0.2	Chromobacterium vaccinii
190	273.16	0.2	Chromobacterium vaccinii
192	273.16	0.2	Chromobacterium vaccinii
146	299.2	0.2	Chromobacterium vaccinii
189	457.4	0.2	Chromobacterium vaccinii
192	457.4	0.2	Chromobacterium vaccinii
63	729.44	0.2	Chromobacterium vaccinii
61	907.38	0.2	Chromobacterium vaccinii
189	907.38	0.2	Chromobacterium vaccinii
190	907.38	0.2	Chromobacterium vaccinii
192	907.38	0.2	Chromobacterium vaccinii
61	926.34	0.2	Chromobacterium vaccinii
189	926.34	0.2	Chromobacterium vaccinii
190	926.34	0.2	Chromobacterium vaccinii
192	926.34	0.2	Chromobacterium vaccinii
61	1377.75	0.2	Chromobacterium vaccinii
61	1671.68	0.2	Chromobacterium vaccinii
63	1671.68	0.2	Chromobacterium vaccinii
189	1671.68	0.2	Chromobacterium vaccinii
190	1671.68	0.2	Chromobacterium vaccinii
192	1671.68	0.2	Chromobacterium vaccinii
61	1672.7	0.2	Chromobacterium vaccinii
63	1672.7	0.2	Chromobacterium vaccinii
190	1672.7	0.2	Chromobacterium vaccinii
192	1672.7	0.2	Chromobacterium vaccinii
63	274.16	0.25	Chromobacterium vaccinii
189	274.16	0.25	Chromobacterium vaccinii
190	274.16	0.25	Chromobacterium vaccinii
192	274.16	0.25	Chromobacterium vaccinii
146	326.14	0.25	Chromobacterium vaccinii
63	357.1	0.25	Chromobacterium vaccinii
63	722.73	0.25	Chromobacterium vaccinii
189	722.73	0.25	Chromobacterium vaccinii
61	908.32	0.25	Chromobacterium vaccinii
189	908.32	0.25	Chromobacterium vaccinii
190	908.32	0.25	Chromobacterium vaccinii
192	908.32	0.25	Chromobacterium vaccinii
61	909.32	0.25	Chromobacterium vaccinii
189	909.32	0.25	Chromobacterium vaccinii
190	909.32	0.25	Chromobacterium vaccinii
192	909.32	0.25	Chromobacterium vaccinii
63	1457.73	0.25	Chromobacterium vaccinii
189	1457.73	0.25	Chromobacterium vaccinii
189	1460.83	0.25	Chromobacterium vaccinii
63	1688.85	0.25	Chromobacterium vaccinii
61	1690.76	0.25	Chromobacterium vaccinii
63	1690.76	0.25	Chromobacterium vaccinii
61	280.24	0.333333	Chromobacterium vaccinii
189	280.24	0.333333	Chromobacterium vaccinii
145	314.14	0.333333	Chromobacterium vaccinii
146	314.14	0.333333	Chromobacterium vaccinii
146	315.15	0.333333	Chromobacterium vaccinii
145	328.12	0.333333	Chromobacterium vaccinii
146	328.12	0.333333	Chromobacterium vaccinii
145	329.13	0.333333	Chromobacterium vaccinii
146	329.13	0.333333	Chromobacterium vaccinii
61	565.28	0.333333	Chromobacterium vaccinii
189	565.28	0.333333	Chromobacterium vaccinii
63	708.4	0.333333	Chromobacterium vaccinii
189	708.4	0.333333	Chromobacterium vaccinii
190	708.4	0.333333	Chromobacterium vaccinii
189	744.29	0.333333	Chromobacterium vaccinii
63	1689.76	0.333333	Chromobacterium vaccinii
190	1748.81	0.333333	Chromobacterium vaccinii
63	214.04	0.5	Chromobacterium vaccinii
145	256.16	0.5	Chromobacterium vaccinii
190	276.6	0.5	Chromobacterium vaccinii
146	296.73	0.5	Chromobacterium vaccinii
145	298.13	0.5	Chromobacterium vaccinii
146	298.13	0.5	Chromobacterium vaccinii
190	305.27	0.5	Chromobacterium vaccinii
145	312.13	0.5	Chromobacterium vaccinii
146	312.13	0.5	Chromobacterium vaccinii
145	344.11	0.5	Chromobacterium vaccinii
146	344.11	0.5	Chromobacterium vaccinii
145	366.09	0.5	Chromobacterium vaccinii
146	366.09	0.5	Chromobacterium vaccinii
189	547.47	0.5	Chromobacterium vaccinii
192	547.47	0.5	Chromobacterium vaccinii
189	725.71	0.5	Chromobacterium vaccinii
63	736.46	0.5	Chromobacterium vaccinii
61	865.38	0.5	Chromobacterium vaccinii
63	1673.74	0.5	Chromobacterium vaccinii
61	1720.79	0.5	Chromobacterium vaccinii
146	205.18	1	Chromobacterium vaccinii
146	310.14	1	Chromobacterium vaccinii
61	326.75	1	Chromobacterium vaccinii
146	588.22	1	Chromobacterium vaccinii
189	613.28	1	Chromobacterium vaccinii
146	621.24	1	Chromobacterium vaccinii
63	1468.6	1	Chromobacterium vaccinii
63	1687.64	1	Chromobacterium vaccinii
262	254.17	0.0144928	Janthinobacterium sp.
262	714.22	0.0144928	Janthinobacterium sp.
262	715.23	0.0144928	Janthinobacterium sp.
262	428.04	0.0151515	Janthinobacterium sp.
262	716.23	0.0151515	Janthinobacterium sp.
262	670.24	0.0166667	Janthinobacterium sp.
262	235.12	0.0172414	Janthinobacterium sp.
262	657.27	0.0175439	Janthinobacterium sp.
262	750.42	0.0188679	Janthinobacterium sp.
262	526.9	0.0192308	Janthinobacterium sp.
262	549.48	0.0196078	Janthinobacterium sp.
262	734.44	0.027027	Janthinobacterium sp.
262	251	0.0277778	Janthinobacterium sp.
262	211.13	0.0294118	Janthinobacterium sp.
262	673.23	0.030303	Janthinobacterium sp.
262	282.22	0.03125	Janthinobacterium sp.
262	257.14	0.0526316	Janthinobacterium sp.
262	735.42	0.0625	Janthinobacterium sp.
262	732.5	0.0666667	Janthinobacterium sp.
262	712.35	0.142857	Janthinobacterium sp.
262	235.02	0.166667	Janthinobacterium sp.
262	357.1	0.25	Janthinobacterium sp.
262	1150.92	0.333333	Janthinobacterium sp.
255	254.17	0.0144928	ND
264	254.17	0.0144928	ND
255	714.22	0.0144928	ND
264	714.22	0.0144928	ND
255	715.23	0.0144928	ND
264	715.23	0.0144928	ND
255	428.04	0.0151515	ND
264	428.04	0.0151515	ND
255	716.23	0.0151515	ND
264	716.23	0.0151515	ND
255	348.08	0.015873	ND
264	348.08	0.015873	ND
255	458.12	0.016129	ND
264	458.12	0.016129	ND
255	440.11	0.0163934	ND
264	440.11	0.0163934	ND
255	655.26	0.0163934	ND
264	655.26	0.0163934	ND
255	670.24	0.0166667	ND
255	235.12	0.0172414	ND
264	235.12	0.0172414	ND
255	448.48	0.0172414	ND
264	448.48	0.0172414	ND
255	657.27	0.0175439	ND
264	657.27	0.0175439	ND
255	843.25	0.0175439	ND
255	255.17	0.0178571	ND
264	255.17	0.0178571	ND
255	526.9	0.0192308	ND
264	526.9	0.0192308	ND
255	656.27	0.0192308	ND
264	656.27	0.0192308	ND
255	671.25	0.0192308	ND
264	549.48	0.0196078	ND
255	542.08	0.02	ND
264	542.08	0.02	ND
264	616.16	0.02	ND
255	668.22	0.0204082	ND
255	1152.58	0.0204082	ND
264	1152.58	0.0204082	ND
255	658.27	0.0212766	ND
255	717.23	0.0212766	ND
255	585.19	0.0222222	ND
264	585.19	0.0222222	ND
255	844.24	0.0232558	ND
255	654.24	0.0243902	ND
255	563.6	0.025641	ND
264	441.05	0.0263158	ND
264	734.44	0.027027	ND
264	1382.65	0.027027	ND
264	780.4	0.0285714	ND
264	211.13	0.0294118	ND
264	617.16	0.0294118	ND
264	1173.53	0.0294118	ND
264	282.22	0.03125	ND
264	1243.59	0.03125	ND
264	1174.53	0.0322581	ND
255	262.1	0.0344828	ND
264	262.1	0.0344828	ND
264	313.15	0.0344828	ND
264	1001.52	0.0344828	ND
255	1190.61	0.0344828	ND
264	1265.57	0.0344828	ND
255	1875.92	0.0344828	ND
264	1875.92	0.0344828	ND
255	586.18	0.0357143	ND
255	1189.56	0.0357143	ND
264	1189.56	0.0357143	ND
255	1872.93	0.0357143	ND
264	1872.93	0.0357143	ND
255	1873.94	0.0357143	ND
264	1873.94	0.0357143	ND
255	851.4	0.037037	ND
264	851.4	0.037037	ND
264	1122.57	0.037037	ND
255	1259.61	0.037037	ND
264	1259.61	0.037037	ND
255	1722.97	0.037037	ND
264	1722.97	0.037037	ND
255	1745.94	0.037037	ND
264	1745.94	0.037037	ND
255	1851.97	0.037037	ND
264	1851.97	0.037037	ND
255	304.3	0.0384615	ND
264	304.3	0.0384615	ND
255	1851	0.0384615	ND
255	1874.94	0.0384615	ND
264	1874.94	0.0384615	ND
255	1877.94	0.0384615	ND
264	1877.94	0.0384615	ND
255	1891.91	0.0384615	ND
264	1891.91	0.0384615	ND
255	1744.93	0.04	ND
255	1760.92	0.04	ND
255	1853.97	0.04	ND
264	1853.97	0.04	ND
255	1876.92	0.04	ND
264	1876.92	0.04	ND
264	1383.67	0.0416667	ND
255	1723.94	0.0416667	ND
264	1723.94	0.0416667	ND
255	1878.91	0.0416667	ND
264	1878.91	0.0416667	ND
264	776.44	0.0434783	ND
264	1250.61	0.0434783	ND
255	1282.6	0.0434783	ND
264	1304.49	0.0434783	ND
255	1386.69	0.0434783	ND
264	1386.69	0.0434783	ND
255	1892.88	0.0434783	ND
264	1892.88	0.0434783	ND
264	1249.61	0.0454546	ND
255	1852.97	0.0454546	ND
264	1852.97	0.0454546	ND
255	1890.89	0.0454546	ND
264	1890.89	0.0454546	ND
255	456.14	0.0476191	ND
264	1002.52	0.0476191	ND
255	1320.53	0.0476191	ND
264	1320.53	0.0476191	ND
255	1761.86	0.0476191	ND
264	1761.86	0.0476191	ND
255	1889.88	0.0476191	ND
264	1889.88	0.0476191	ND
264	443.01	0.05	ND
264	1305.51	0.05	ND
255	1724.96	0.05	ND
264	1724.96	0.05	ND
255	257.14	0.0526316	ND
264	257.14	0.0526316	ND
264	1246.41	0.0526316	ND
255	1283.6	0.0526316	ND
255	1284.64	0.0526316	ND
264	1284.64	0.0526316	ND
255	1590.78	0.0526316	ND
255	1879.89	0.0526316	ND
264	1879.89	0.0526316	ND
255	1888.9	0.0526316	ND
255	429.05	0.0555556	ND
264	1019.56	0.0555556	ND
264	1118.49	0.0555556	ND
255	1746.87	0.0555556	ND
264	1746.87	0.0555556	ND
255	1854.96	0.0555556	ND
264	1854.96	0.0555556	ND
264	712.51	0.0588235	ND
264	852.44	0.0588235	ND
264	1146.62	0.0588235	ND
264	1153.54	0.0588235	ND
264	1175.66	0.0588235	ND
264	1298.64	0.0588235	ND
264	735.42	0.0625	ND
255	859.36	0.0625	ND
255	1321.53	0.0625	ND
264	1321.53	0.0625	ND
255	1738.93	0.0625	ND
255	1762.82	0.0625	ND
264	1762.82	0.0625	ND
264	573.32	0.0666667	ND
255	798.26	0.0666667	ND
264	1130.59	0.0666667	ND
264	1591.78	0.0666667	ND
255	1607.67	0.0666667	ND
255	800.29	0.0714286	ND
264	1020.57	0.0714286	ND
264	1387.69	0.0714286	ND
255	1739.88	0.0714286	ND
264	1739.88	0.0714286	ND
264	1747.83	0.0714286	ND
255	1893.86	0.0714286	ND
264	1893.86	0.0714286	ND
264	345.17	0.0769231	ND
264	1248.76	0.0769231	ND
255	1855.91	0.0769231	ND
264	1855.91	0.0769231	ND
255	330.08	0.0833333	ND
264	1047.59	0.0833333	ND
264	1456.67	0.0833333	ND
255	1472.72	0.0833333	ND
255	1725.85	0.0833333	ND
264	1725.85	0.0833333	ND
255	1982.98	0.0833333	ND
264	1982.98	0.0833333	ND
264	373.24	0.0909091	ND
264	760.44	0.0909091	ND
264	1285.67	0.0909091	ND
264	1592.78	0.0909091	ND
255	1763.82	0.0909091	ND
264	1763.82	0.0909091	ND
255	1870.86	0.0909091	ND
264	1870.86	0.0909091	ND
255	1894.87	0.0909091	ND
264	1894.87	0.0909091	ND
255	845.24	0.1	ND
255	1606.75	0.1	ND
264	1872.03	0.1	ND
255	1880.89	0.1	ND
264	1880.89	0.1	ND
255	1982.01	0.1	ND
255	327.12	0.111111	ND
255	457.13	0.111111	ND
255	932.45	0.111111	ND
264	932.45	0.111111	ND
264	1119.56	0.111111	ND
264	1306.6	0.111111	ND
255	1471.77	0.111111	ND
255	1856.89	0.111111	ND
264	1856.89	0.111111	ND
255	1322.6	0.125	ND
264	1395.7	0.125	ND
255	1569.69	0.125	ND
264	1569.69	0.125	ND
264	332.28	0.142857	ND
255	587.16	0.142857	ND
255	1416.63	0.142857	ND
264	1719.81	0.142857	ND
264	267.18	0.166667	ND
264	910.82	0.166667	ND
255	972.27	0.166667	ND
255	973.28	0.166667	ND
264	1048.53	0.166667	ND
255	1568.8	0.166667	ND
255	1608.76	0.166667	ND
264	1740.83	0.166667	ND
255	1869.91	0.166667	ND
255	1983.95	0.166667	ND
264	1983.95	0.166667	ND
264	1129.6	0.2	ND
264	357.1	0.25	ND
255	797.4	0.25	ND
264	827.46	0.25	ND
264	1244.95	0.25	ND
264	1260.93	0.25	ND
264	1266.93	0.25	ND
264	1417.68	0.25	ND
264	1457.73	0.25	ND
255	1460.83	0.25	ND
264	1570.73	0.25	ND
255	1697.4	0.25	ND
264	1697.4	0.25	ND
255	1726.85	0.25	ND
264	1726.85	0.25	ND
255	1857.89	0.25	ND
264	1857.89	0.25	ND
264	1895.86	0.25	ND
255	328.12	0.333333	ND
255	329.13	0.333333	ND
264	933.52	0.333333	ND
264	997.54	0.333333	ND
264	1052.6	0.333333	ND
264	1283.85	0.333333	ND
255	1411.63	0.333333	ND
255	1734.79	0.333333	ND
255	1735.7	0.333333	ND
264	1748.81	0.333333	ND
264	761.4	0.5	ND
264	762.41	0.5	ND
264	828.46	0.5	ND
264	945.25	0.5	ND
255	974.42	0.5	ND
264	1049.58	0.5	ND
264	1282.86	0.5	ND
264	1299.86	0.5	ND
264	1720.79	0.5	ND
264	1741.81	0.5	ND
255	217.14	1	ND
255	258.13	1	ND
255	736.87	1	ND
255	806.44	1	ND
255	846.31	1	ND
264	897.53	1	ND
264	948.54	1	ND
264	998.57	1	ND
264	1221.87	1	ND
49	254.17	0.0144928	Pseudomonas sp.
50	254.17	0.0144928	Pseudomonas sp.
51	254.17	0.0144928	Pseudomonas sp.
52	254.17	0.0144928	Pseudomonas sp.
53	254.17	0.0144928	Pseudomonas sp.
54	254.17	0.0144928	Pseudomonas sp.
56	254.17	0.0144928	Pseudomonas sp.
57	254.17	0.0144928	Pseudomonas sp.
58	254.17	0.0144928	Pseudomonas sp.
59	254.17	0.0144928	Pseudomonas sp.
60	254.17	0.0144928	Pseudomonas sp.
64	254.17	0.0144928	Pseudomonas sp.
129	254.17	0.0144928	Pseudomonas sp.
130	254.17	0.0144928	Pseudomonas sp.
131	254.17	0.0144928	Pseudomonas sp.
132	254.17	0.0144928	Pseudomonas sp.
133	254.17	0.0144928	Pseudomonas sp.
134	254.17	0.0144928	Pseudomonas sp.
135	254.17	0.0144928	Pseudomonas sp.
136	254.17	0.0144928	Pseudomonas sp.
137	254.17	0.0144928	Pseudomonas sp.
138	254.17	0.0144928	Pseudomonas sp.
139	254.17	0.0144928	Pseudomonas sp.
140	254.17	0.0144928	Pseudomonas sp.
141	254.17	0.0144928	Pseudomonas sp.
142	254.17	0.0144928	Pseudomonas sp.
143	254.17	0.0144928	Pseudomonas sp.
144	254.17	0.0144928	Pseudomonas sp.
186	254.17	0.0144928	Pseudomonas sp.
188	254.17	0.0144928	Pseudomonas sp.
193	254.17	0.0144928	Pseudomonas sp.
195	254.17	0.0144928	Pseudomonas sp.
196	254.17	0.0144928	Pseudomonas sp.
197	254.17	0.0144928	Pseudomonas sp.
198	254.17	0.0144928	Pseudomonas sp.
256	254.17	0.0144928	Pseudomonas sp.
257	254.17	0.0144928	Pseudomonas sp.
258	254.17	0.0144928	Pseudomonas sp.
259	254.17	0.0144928	Pseudomonas sp.
260	254.17	0.0144928	Pseudomonas sp.
261	254.17	0.0144928	Pseudomonas sp.
263	254.17	0.0144928	Pseudomonas sp.
265	254.17	0.0144928	Pseudomonas sp.
266	254.17	0.0144928	Pseudomonas sp.
267	254.17	0.0144928	Pseudomonas sp.
268	254.17	0.0144928	Pseudomonas sp.
269	254.17	0.0144928	Pseudomonas sp.
270	254.17	0.0144928	Pseudomonas sp.
271	254.17	0.0144928	Pseudomonas sp.
272	254.17	0.0144928	Pseudomonas sp.
273	254.17	0.0144928	Pseudomonas sp.
274	254.17	0.0144928	Pseudomonas sp.
275	254.17	0.0144928	Pseudomonas sp.
276	254.17	0.0144928	Pseudomonas sp.
277	254.17	0.0144928	Pseudomonas sp.
49	714.22	0.0144928	Pseudomonas sp.
50	714.22	0.0144928	Pseudomonas sp.
51	714.22	0.0144928	Pseudomonas sp.
52	714.22	0.0144928	Pseudomonas sp.
53	714.22	0.0144928	Pseudomonas sp.
54	714.22	0.0144928	Pseudomonas sp.
56	714.22	0.0144928	Pseudomonas sp.
57	714.22	0.0144928	Pseudomonas sp.
58	714.22	0.0144928	Pseudomonas sp.
59	714.22	0.0144928	Pseudomonas sp.
60	714.22	0.0144928	Pseudomonas sp.
64	714.22	0.0144928	Pseudomonas sp.
129	714.22	0.0144928	Pseudomonas sp.
130	714.22	0.0144928	Pseudomonas sp.
131	714.22	0.0144928	Pseudomonas sp.
132	714.22	0.0144928	Pseudomonas sp.
133	714.22	0.0144928	Pseudomonas sp.
134	714.22	0.0144928	Pseudomonas sp.
135	714.22	0.0144928	Pseudomonas sp.
136	714.22	0.0144928	Pseudomonas sp.
137	714.22	0.0144928	Pseudomonas sp.
138	714.22	0.0144928	Pseudomonas sp.
139	714.22	0.0144928	Pseudomonas sp.
140	714.22	0.0144928	Pseudomonas sp.
141	714.22	0.0144928	Pseudomonas sp.
142	714.22	0.0144928	Pseudomonas sp.
143	714.22	0.0144928	Pseudomonas sp.
144	714.22	0.0144928	Pseudomonas sp.
186	714.22	0.0144928	Pseudomonas sp.
188	714.22	0.0144928	Pseudomonas sp.
193	714.22	0.0144928	Pseudomonas sp.
195	714.22	0.0144928	Pseudomonas sp.
196	714.22	0.0144928	Pseudomonas sp.
197	714.22	0.0144928	Pseudomonas sp.
198	714.22	0.0144928	Pseudomonas sp.
256	714.22	0.0144928	Pseudomonas sp.
257	714.22	0.0144928	Pseudomonas sp.
258	714.22	0.0144928	Pseudomonas sp.
259	714.22	0.0144928	Pseudomonas sp.
260	714.22	0.0144928	Pseudomonas sp.
261	714.22	0.0144928	Pseudomonas sp.
263	714.22	0.0144928	Pseudomonas sp.
265	714.22	0.0144928	Pseudomonas sp.
266	714.22	0.0144928	Pseudomonas sp.
267	714.22	0.0144928	Pseudomonas sp.
268	714.22	0.0144928	Pseudomonas sp.
269	714.22	0.0144928	Pseudomonas sp.
270	714.22	0.0144928	Pseudomonas sp.
271	714.22	0.0144928	Pseudomonas sp.
272	714.22	0.0144928	Pseudomonas sp.
273	714.22	0.0144928	Pseudomonas sp.
274	714.22	0.0144928	Pseudomonas sp.
275	714.22	0.0144928	Pseudomonas sp.
276	714.22	0.0144928	Pseudomonas sp.
277	714.22	0.0144928	Pseudomonas sp.
49	715.23	0.0144928	Pseudomonas sp.
50	715.23	0.0144928	Pseudomonas sp.
51	715.23	0.0144928	Pseudomonas sp.
52	715.23	0.0144928	Pseudomonas sp.
53	715.23	0.0144928	Pseudomonas sp.
54	715.23	0.0144928	Pseudomonas sp.
56	715.23	0.0144928	Pseudomonas sp.
57	715.23	0.0144928	Pseudomonas sp.
58	715.23	0.0144928	Pseudomonas sp.
59	715.23	0.0144928	Pseudomonas sp.
60	715.23	0.0144928	Pseudomonas sp.
64	715.23	0.0144928	Pseudomonas sp.
129	715.23	0.0144928	Pseudomonas sp.
130	715.23	0.0144928	Pseudomonas sp.
131	715.23	0.0144928	Pseudomonas sp.
132	715.23	0.0144928	Pseudomonas sp.
133	715.23	0.0144928	Pseudomonas sp.
134	715.23	0.0144928	Pseudomonas sp.
135	715.23	0.0144928	Pseudomonas sp.
136	715.23	0.0144928	Pseudomonas sp.
137	715.23	0.0144928	Pseudomonas sp.
138	715.23	0.0144928	Pseudomonas sp.
139	715.23	0.0144928	Pseudomonas sp.
140	715.23	0.0144928	Pseudomonas sp.
141	715.23	0.0144928	Pseudomonas sp.
142	715.23	0.0144928	Pseudomonas sp.
143	715.23	0.0144928	Pseudomonas sp.
144	715.23	0.0144928	Pseudomonas sp.
186	715.23	0.0144928	Pseudomonas sp.
188	715.23	0.0144928	Pseudomonas sp.
193	715.23	0.0144928	Pseudomonas sp.
195	715.23	0.0144928	Pseudomonas sp.
196	715.23	0.0144928	Pseudomonas sp.
197	715.23	0.0144928	Pseudomonas sp.
198	715.23	0.0144928	Pseudomonas sp.
256	715.23	0.0144928	Pseudomonas sp.
257	715.23	0.0144928	Pseudomonas sp.
258	715.23	0.0144928	Pseudomonas sp.
259	715.23	0.0144928	Pseudomonas sp.
260	715.23	0.0144928	Pseudomonas sp.
261	715.23	0.0144928	Pseudomonas sp.
263	715.23	0.0144928	Pseudomonas sp.
265	715.23	0.0144928	Pseudomonas sp.
266	715.23	0.0144928	Pseudomonas sp.
267	715.23	0.0144928	Pseudomonas sp.
268	715.23	0.0144928	Pseudomonas sp.
269	715.23	0.0144928	Pseudomonas sp.
270	715.23	0.0144928	Pseudomonas sp.
271	715.23	0.0144928	Pseudomonas sp.
272	715.23	0.0144928	Pseudomonas sp.
273	715.23	0.0144928	Pseudomonas sp.
274	715.23	0.0144928	Pseudomonas sp.
275	715.23	0.0144928	Pseudomonas sp.
276	715.23	0.0144928	Pseudomonas sp.
277	715.23	0.0144928	Pseudomonas sp.
49	428.04	0.0151515	Pseudomonas sp.
50	428.04	0.0151515	Pseudomonas sp.
51	428.04	0.0151515	Pseudomonas sp.
52	428.04	0.0151515	Pseudomonas sp.
53	428.04	0.0151515	Pseudomonas sp.
54	428.04	0.0151515	Pseudomonas sp.
56	428.04	0.0151515	Pseudomonas sp.
57	428.04	0.0151515	Pseudomonas sp.
58	428.04	0.0151515	Pseudomonas sp.
59	428.04	0.0151515	Pseudomonas sp.
60	428.04	0.0151515	Pseudomonas sp.
64	428.04	0.0151515	Pseudomonas sp.
129	428.04	0.0151515	Pseudomonas sp.
130	428.04	0.0151515	Pseudomonas sp.
131	428.04	0.0151515	Pseudomonas sp.
132	428.04	0.0151515	Pseudomonas sp.
133	428.04	0.0151515	Pseudomonas sp.
134	428.04	0.0151515	Pseudomonas sp.
135	428.04	0.0151515	Pseudomonas sp.
136	428.04	0.0151515	Pseudomonas sp.
138	428.04	0.0151515	Pseudomonas sp.
139	428.04	0.0151515	Pseudomonas sp.
140	428.04	0.0151515	Pseudomonas sp.
141	428.04	0.0151515	Pseudomonas sp.
142	428.04	0.0151515	Pseudomonas sp.
143	428.04	0.0151515	Pseudomonas sp.
144	428.04	0.0151515	Pseudomonas sp.
186	428.04	0.0151515	Pseudomonas sp.
188	428.04	0.0151515	Pseudomonas sp.
193	428.04	0.0151515	Pseudomonas sp.
195	428.04	0.0151515	Pseudomonas sp.
196	428.04	0.0151515	Pseudomonas sp.
197	428.04	0.0151515	Pseudomonas sp.
198	428.04	0.0151515	Pseudomonas sp.
256	428.04	0.0151515	Pseudomonas sp.
257	428.04	0.0151515	Pseudomonas sp.
258	428.04	0.0151515	Pseudomonas sp.
259	428.04	0.0151515	Pseudomonas sp.
260	428.04	0.0151515	Pseudomonas sp.
261	428.04	0.0151515	Pseudomonas sp.
263	428.04	0.0151515	Pseudomonas sp.
265	428.04	0.0151515	Pseudomonas sp.
266	428.04	0.0151515	Pseudomonas sp.
267	428.04	0.0151515	Pseudomonas sp.
268	428.04	0.0151515	Pseudomonas sp.
270	428.04	0.0151515	Pseudomonas sp.
271	428.04	0.0151515	Pseudomonas sp.
272	428.04	0.0151515	Pseudomonas sp.
274	428.04	0.0151515	Pseudomonas sp.
275	428.04	0.0151515	Pseudomonas sp.
276	428.04	0.0151515	Pseudomonas sp.
277	428.04	0.0151515	Pseudomonas sp.
49	716.23	0.0151515	Pseudomonas sp.
50	716.23	0.0151515	Pseudomonas sp.
51	716.23	0.0151515	Pseudomonas sp.
52	716.23	0.0151515	Pseudomonas sp.
53	716.23	0.0151515	Pseudomonas sp.
54	716.23	0.0151515	Pseudomonas sp.
56	716.23	0.0151515	Pseudomonas sp.
57	716.23	0.0151515	Pseudomonas sp.
58	716.23	0.0151515	Pseudomonas sp.
59	716.23	0.0151515	Pseudomonas sp.
60	716.23	0.0151515	Pseudomonas sp.
64	716.23	0.0151515	Pseudomonas sp.
129	716.23	0.0151515	Pseudomonas sp.
130	716.23	0.0151515	Pseudomonas sp.
131	716.23	0.0151515	Pseudomonas sp.
132	716.23	0.0151515	Pseudomonas sp.
133	716.23	0.0151515	Pseudomonas sp.
134	716.23	0.0151515	Pseudomonas sp.
135	716.23	0.0151515	Pseudomonas sp.
136	716.23	0.0151515	Pseudomonas sp.
137	716.23	0.0151515	Pseudomonas sp.
138	716.23	0.0151515	Pseudomonas sp.
139	716.23	0.0151515	Pseudomonas sp.
140	716.23	0.0151515	Pseudomonas sp.
141	716.23	0.0151515	Pseudomonas sp.
142	716.23	0.0151515	Pseudomonas sp.
143	716.23	0.0151515	Pseudomonas sp.
144	716.23	0.0151515	Pseudomonas sp.
186	716.23	0.0151515	Pseudomonas sp.
188	716.23	0.0151515	Pseudomonas sp.
193	716.23	0.0151515	Pseudomonas sp.
195	716.23	0.0151515	Pseudomonas sp.
196	716.23	0.0151515	Pseudomonas sp.
197	716.23	0.0151515	Pseudomonas sp.
198	716.23	0.0151515	Pseudomonas sp.
256	716.23	0.0151515	Pseudomonas sp.
257	716.23	0.0151515	Pseudomonas sp.
258	716.23	0.0151515	Pseudomonas sp.
259	716.23	0.0151515	Pseudomonas sp.
260	716.23	0.0151515	Pseudomonas sp.
261	716.23	0.0151515	Pseudomonas sp.
263	716.23	0.0151515	Pseudomonas sp.
265	716.23	0.0151515	Pseudomonas sp.
266	716.23	0.0151515	Pseudomonas sp.
267	716.23	0.0151515	Pseudomonas sp.
268	716.23	0.0151515	Pseudomonas sp.
270	716.23	0.0151515	Pseudomonas sp.
271	716.23	0.0151515	Pseudomonas sp.
272	716.23	0.0151515	Pseudomonas sp.
274	716.23	0.0151515	Pseudomonas sp.
275	716.23	0.0151515	Pseudomonas sp.
276	716.23	0.0151515	Pseudomonas sp.
277	716.23	0.0151515	Pseudomonas sp.
49	348.08	0.015873	Pseudomonas sp.
50	348.08	0.015873	Pseudomonas sp.
51	348.08	0.015873	Pseudomonas sp.
52	348.08	0.015873	Pseudomonas sp.
53	348.08	0.015873	Pseudomonas sp.
54	348.08	0.015873	Pseudomonas sp.
56	348.08	0.015873	Pseudomonas sp.
57	348.08	0.015873	Pseudomonas sp.
58	348.08	0.015873	Pseudomonas sp.
59	348.08	0.015873	Pseudomonas sp.
60	348.08	0.015873	Pseudomonas sp.
64	348.08	0.015873	Pseudomonas sp.
129	348.08	0.015873	Pseudomonas sp.
130	348.08	0.015873	Pseudomonas sp.
131	348.08	0.015873	Pseudomonas sp.
132	348.08	0.015873	Pseudomonas sp.
133	348.08	0.015873	Pseudomonas sp.
134	348.08	0.015873	Pseudomonas sp.
135	348.08	0.015873	Pseudomonas sp.
138	348.08	0.015873	Pseudomonas sp.
139	348.08	0.015873	Pseudomonas sp.
140	348.08	0.015873	Pseudomonas sp.
141	348.08	0.015873	Pseudomonas sp.
142	348.08	0.015873	Pseudomonas sp.
143	348.08	0.015873	Pseudomonas sp.
144	348.08	0.015873	Pseudomonas sp.
186	348.08	0.015873	Pseudomonas sp.
188	348.08	0.015873	Pseudomonas sp.
193	348.08	0.015873	Pseudomonas sp.
195	348.08	0.015873	Pseudomonas sp.
196	348.08	0.015873	Pseudomonas sp.
197	348.08	0.015873	Pseudomonas sp.
198	348.08	0.015873	Pseudomonas sp.
256	348.08	0.015873	Pseudomonas sp.
257	348.08	0.015873	Pseudomonas sp.
258	348.08	0.015873	Pseudomonas sp.
259	348.08	0.015873	Pseudomonas sp.
260	348.08	0.015873	Pseudomonas sp.
261	348.08	0.015873	Pseudomonas sp.
263	348.08	0.015873	Pseudomonas sp.
265	348.08	0.015873	Pseudomonas sp.
266	348.08	0.015873	Pseudomonas sp.
267	348.08	0.015873	Pseudomonas sp.
268	348.08	0.015873	Pseudomonas sp.
270	348.08	0.015873	Pseudomonas sp.
271	348.08	0.015873	Pseudomonas sp.
272	348.08	0.015873	Pseudomonas sp.
274	348.08	0.015873	Pseudomonas sp.
275	348.08	0.015873	Pseudomonas sp.
276	348.08	0.015873	Pseudomonas sp.
277	348.08	0.015873	Pseudomonas sp.
49	458.12	0.016129	Pseudomonas sp.
50	458.12	0.016129	Pseudomonas sp.
51	458.12	0.016129	Pseudomonas sp.
52	458.12	0.016129	Pseudomonas sp.
53	458.12	0.016129	Pseudomonas sp.
54	458.12	0.016129	Pseudomonas sp.
56	458.12	0.016129	Pseudomonas sp.
59	458.12	0.016129	Pseudomonas sp.
60	458.12	0.016129	Pseudomonas sp.
64	458.12	0.016129	Pseudomonas sp.
129	458.12	0.016129	Pseudomonas sp.
130	458.12	0.016129	Pseudomonas sp.
131	458.12	0.016129	Pseudomonas sp.
132	458.12	0.016129	Pseudomonas sp.
133	458.12	0.016129	Pseudomonas sp.
134	458.12	0.016129	Pseudomonas sp.
135	458.12	0.016129	Pseudomonas sp.
136	458.12	0.016129	Pseudomonas sp.
137	458.12	0.016129	Pseudomonas sp.
138	458.12	0.016129	Pseudomonas sp.
139	458.12	0.016129	Pseudomonas sp.
140	458.12	0.016129	Pseudomonas sp.
141	458.12	0.016129	Pseudomonas sp.
142	458.12	0.016129	Pseudomonas sp.
143	458.12	0.016129	Pseudomonas sp.
144	458.12	0.016129	Pseudomonas sp.
186	458.12	0.016129	Pseudomonas sp.
188	458.12	0.016129	Pseudomonas sp.
193	458.12	0.016129	Pseudomonas sp.
195	458.12	0.016129	Pseudomonas sp.
196	458.12	0.016129	Pseudomonas sp.
197	458.12	0.016129	Pseudomonas sp.
198	458.12	0.016129	Pseudomonas sp.
256	458.12	0.016129	Pseudomonas sp.
257	458.12	0.016129	Pseudomonas sp.
258	458.12	0.016129	Pseudomonas sp.
259	458.12	0.016129	Pseudomonas sp.
260	458.12	0.016129	Pseudomonas sp.
263	458.12	0.016129	Pseudomonas sp.
265	458.12	0.016129	Pseudomonas sp.
266	458.12	0.016129	Pseudomonas sp.
267	458.12	0.016129	Pseudomonas sp.
268	458.12	0.016129	Pseudomonas sp.
270	458.12	0.016129	Pseudomonas sp.
271	458.12	0.016129	Pseudomonas sp.
272	458.12	0.016129	Pseudomonas sp.
274	458.12	0.016129	Pseudomonas sp.
275	458.12	0.016129	Pseudomonas sp.
276	458.12	0.016129	Pseudomonas sp.
49	440.11	0.0163934	Pseudomonas sp.
50	440.11	0.0163934	Pseudomonas sp.
51	440.11	0.0163934	Pseudomonas sp.
52	440.11	0.0163934	Pseudomonas sp.
53	440.11	0.0163934	Pseudomonas sp.
54	440.11	0.0163934	Pseudomonas sp.
56	440.11	0.0163934	Pseudomonas sp.
59	440.11	0.0163934	Pseudomonas sp.
60	440.11	0.0163934	Pseudomonas sp.
64	440.11	0.0163934	Pseudomonas sp.
129	440.11	0.0163934	Pseudomonas sp.
130	440.11	0.0163934	Pseudomonas sp.
131	440.11	0.0163934	Pseudomonas sp.
132	440.11	0.0163934	Pseudomonas sp.
133	440.11	0.0163934	Pseudomonas sp.
134	440.11	0.0163934	Pseudomonas sp.
135	440.11	0.0163934	Pseudomonas sp.
136	440.11	0.0163934	Pseudomonas sp.
138	440.11	0.0163934	Pseudomonas sp.
139	440.11	0.0163934	Pseudomonas sp.
140	440.11	0.0163934	Pseudomonas sp.
141	440.11	0.0163934	Pseudomonas sp.
142	440.11	0.0163934	Pseudomonas sp.
143	440.11	0.0163934	Pseudomonas sp.
186	440.11	0.0163934	Pseudomonas sp.
188	440.11	0.0163934	Pseudomonas sp.
193	440.11	0.0163934	Pseudomonas sp.
195	440.11	0.0163934	Pseudomonas sp.
196	440.11	0.0163934	Pseudomonas sp.
197	440.11	0.0163934	Pseudomonas sp.
198	440.11	0.0163934	Pseudomonas sp.
256	440.11	0.0163934	Pseudomonas sp.
257	440.11	0.0163934	Pseudomonas sp.
258	440.11	0.0163934	Pseudomonas sp.
259	440.11	0.0163934	Pseudomonas sp.
260	440.11	0.0163934	Pseudomonas sp.
261	440.11	0.0163934	Pseudomonas sp.
263	440.11	0.0163934	Pseudomonas sp.
265	440.11	0.0163934	Pseudomonas sp.
266	440.11	0.0163934	Pseudomonas sp.
267	440.11	0.0163934	Pseudomonas sp.
268	440.11	0.0163934	Pseudomonas sp.
270	440.11	0.0163934	Pseudomonas sp.
271	440.11	0.0163934	Pseudomonas sp.
272	440.11	0.0163934	Pseudomonas sp.
273	440.11	0.0163934	Pseudomonas sp.
274	440.11	0.0163934	Pseudomonas sp.
275	440.11	0.0163934	Pseudomonas sp.
276	440.11	0.0163934	Pseudomonas sp.
277	440.11	0.0163934	Pseudomonas sp.
49	655.26	0.0163934	Pseudomonas sp.
50	655.26	0.0163934	Pseudomonas sp.
51	655.26	0.0163934	Pseudomonas sp.
52	655.26	0.0163934	Pseudomonas sp.
53	655.26	0.0163934	Pseudomonas sp.
54	655.26	0.0163934	Pseudomonas sp.
56	655.26	0.0163934	Pseudomonas sp.
57	655.26	0.0163934	Pseudomonas sp.
58	655.26	0.0163934	Pseudomonas sp.
59	655.26	0.0163934	Pseudomonas sp.
60	655.26	0.0163934	Pseudomonas sp.
64	655.26	0.0163934	Pseudomonas sp.
129	655.26	0.0163934	Pseudomonas sp.
130	655.26	0.0163934	Pseudomonas sp.
131	655.26	0.0163934	Pseudomonas sp.
132	655.26	0.0163934	Pseudomonas sp.
133	655.26	0.0163934	Pseudomonas sp.
134	655.26	0.0163934	Pseudomonas sp.
135	655.26	0.0163934	Pseudomonas sp.
136	655.26	0.0163934	Pseudomonas sp.
137	655.26	0.0163934	Pseudomonas sp.
138	655.26	0.0163934	Pseudomonas sp.
139	655.26	0.0163934	Pseudomonas sp.
140	655.26	0.0163934	Pseudomonas sp.
141	655.26	0.0163934	Pseudomonas sp.
142	655.26	0.0163934	Pseudomonas sp.
143	655.26	0.0163934	Pseudomonas sp.
144	655.26	0.0163934	Pseudomonas sp.
186	655.26	0.0163934	Pseudomonas sp.
188	655.26	0.0163934	Pseudomonas sp.
193	655.26	0.0163934	Pseudomonas sp.
195	655.26	0.0163934	Pseudomonas sp.
196	655.26	0.0163934	Pseudomonas sp.
197	655.26	0.0163934	Pseudomonas sp.
198	655.26	0.0163934	Pseudomonas sp.
256	655.26	0.0163934	Pseudomonas sp.
257	655.26	0.0163934	Pseudomonas sp.
258	655.26	0.0163934	Pseudomonas sp.
259	655.26	0.0163934	Pseudomonas sp.
260	655.26	0.0163934	Pseudomonas sp.
261	655.26	0.0163934	Pseudomonas sp.
263	655.26	0.0163934	Pseudomonas sp.
265	655.26	0.0163934	Pseudomonas sp.
266	655.26	0.0163934	Pseudomonas sp.
267	655.26	0.0163934	Pseudomonas sp.
268	655.26	0.0163934	Pseudomonas sp.
269	655.26	0.0163934	Pseudomonas sp.
270	655.26	0.0163934	Pseudomonas sp.
271	655.26	0.0163934	Pseudomonas sp.
272	655.26	0.0163934	Pseudomonas sp.
274	655.26	0.0163934	Pseudomonas sp.
275	655.26	0.0163934	Pseudomonas sp.
276	655.26	0.0163934	Pseudomonas sp.
277	655.26	0.0163934	Pseudomonas sp.
49	670.24	0.0166667	Pseudomonas sp.
50	670.24	0.0166667	Pseudomonas sp.
51	670.24	0.0166667	Pseudomonas sp.
52	670.24	0.0166667	Pseudomonas sp.
53	670.24	0.0166667	Pseudomonas sp.
54	670.24	0.0166667	Pseudomonas sp.
56	670.24	0.0166667	Pseudomonas sp.
57	670.24	0.0166667	Pseudomonas sp.
58	670.24	0.0166667	Pseudomonas sp.
59	670.24	0.0166667	Pseudomonas sp.
60	670.24	0.0166667	Pseudomonas sp.
64	670.24	0.0166667	Pseudomonas sp.
129	670.24	0.0166667	Pseudomonas sp.
130	670.24	0.0166667	Pseudomonas sp.
131	670.24	0.0166667	Pseudomonas sp.
132	670.24	0.0166667	Pseudomonas sp.
133	670.24	0.0166667	Pseudomonas sp.
134	670.24	0.0166667	Pseudomonas sp.
135	670.24	0.0166667	Pseudomonas sp.
136	670.24	0.0166667	Pseudomonas sp.
137	670.24	0.0166667	Pseudomonas sp.
138	670.24	0.0166667	Pseudomonas sp.
139	670.24	0.0166667	Pseudomonas sp.
140	670.24	0.0166667	Pseudomonas sp.
141	670.24	0.0166667	Pseudomonas sp.
142	670.24	0.0166667	Pseudomonas sp.
143	670.24	0.0166667	Pseudomonas sp.
144	670.24	0.0166667	Pseudomonas sp.
186	670.24	0.0166667	Pseudomonas sp.
188	670.24	0.0166667	Pseudomonas sp.
193	670.24	0.0166667	Pseudomonas sp.
195	670.24	0.0166667	Pseudomonas sp.
196	670.24	0.0166667	Pseudomonas sp.
198	670.24	0.0166667	Pseudomonas sp.
256	670.24	0.0166667	Pseudomonas sp.
257	670.24	0.0166667	Pseudomonas sp.
258	670.24	0.0166667	Pseudomonas sp.
259	670.24	0.0166667	Pseudomonas sp.
260	670.24	0.0166667	Pseudomonas sp.
261	670.24	0.0166667	Pseudomonas sp.
263	670.24	0.0166667	Pseudomonas sp.
265	670.24	0.0166667	Pseudomonas sp.
266	670.24	0.0166667	Pseudomonas sp.
267	670.24	0.0166667	Pseudomonas sp.
268	670.24	0.0166667	Pseudomonas sp.
271	670.24	0.0166667	Pseudomonas sp.
272	670.24	0.0166667	Pseudomonas sp.
274	670.24	0.0166667	Pseudomonas sp.
276	670.24	0.0166667	Pseudomonas sp.
49	235.12	0.0172414	Pseudomonas sp.
50	235.12	0.0172414	Pseudomonas sp.
52	235.12	0.0172414	Pseudomonas sp.
53	235.12	0.0172414	Pseudomonas sp.
54	235.12	0.0172414	Pseudomonas sp.
56	235.12	0.0172414	Pseudomonas sp.
57	235.12	0.0172414	Pseudomonas sp.
59	235.12	0.0172414	Pseudomonas sp.
60	235.12	0.0172414	Pseudomonas sp.
64	235.12	0.0172414	Pseudomonas sp.
130	235.12	0.0172414	Pseudomonas sp.
131	235.12	0.0172414	Pseudomonas sp.
132	235.12	0.0172414	Pseudomonas sp.
133	235.12	0.0172414	Pseudomonas sp.
134	235.12	0.0172414	Pseudomonas sp.
135	235.12	0.0172414	Pseudomonas sp.
136	235.12	0.0172414	Pseudomonas sp.
138	235.12	0.0172414	Pseudomonas sp.
139	235.12	0.0172414	Pseudomonas sp.
140	235.12	0.0172414	Pseudomonas sp.
141	235.12	0.0172414	Pseudomonas sp.
142	235.12	0.0172414	Pseudomonas sp.
143	235.12	0.0172414	Pseudomonas sp.
144	235.12	0.0172414	Pseudomonas sp.
186	235.12	0.0172414	Pseudomonas sp.
188	235.12	0.0172414	Pseudomonas sp.
195	235.12	0.0172414	Pseudomonas sp.
196	235.12	0.0172414	Pseudomonas sp.
197	235.12	0.0172414	Pseudomonas sp.
198	235.12	0.0172414	Pseudomonas sp.
256	235.12	0.0172414	Pseudomonas sp.
257	235.12	0.0172414	Pseudomonas sp.
258	235.12	0.0172414	Pseudomonas sp.
259	235.12	0.0172414	Pseudomonas sp.
260	235.12	0.0172414	Pseudomonas sp.
261	235.12	0.0172414	Pseudomonas sp.
263	235.12	0.0172414	Pseudomonas sp.
265	235.12	0.0172414	Pseudomonas sp.
266	235.12	0.0172414	Pseudomonas sp.
267	235.12	0.0172414	Pseudomonas sp.
271	235.12	0.0172414	Pseudomonas sp.
272	235.12	0.0172414	Pseudomonas sp.
274	235.12	0.0172414	Pseudomonas sp.
276	235.12	0.0172414	Pseudomonas sp.
277	235.12	0.0172414	Pseudomonas sp.
49	448.48	0.0172414	Pseudomonas sp.
50	448.48	0.0172414	Pseudomonas sp.
51	448.48	0.0172414	Pseudomonas sp.
52	448.48	0.0172414	Pseudomonas sp.
53	448.48	0.0172414	Pseudomonas sp.
54	448.48	0.0172414	Pseudomonas sp.
56	448.48	0.0172414	Pseudomonas sp.
57	448.48	0.0172414	Pseudomonas sp.
58	448.48	0.0172414	Pseudomonas sp.
59	448.48	0.0172414	Pseudomonas sp.
60	448.48	0.0172414	Pseudomonas sp.
64	448.48	0.0172414	Pseudomonas sp.
129	448.48	0.0172414	Pseudomonas sp.
130	448.48	0.0172414	Pseudomonas sp.
131	448.48	0.0172414	Pseudomonas sp.
132	448.48	0.0172414	Pseudomonas sp.
133	448.48	0.0172414	Pseudomonas sp.
134	448.48	0.0172414	Pseudomonas sp.
135	448.48	0.0172414	Pseudomonas sp.
136	448.48	0.0172414	Pseudomonas sp.
138	448.48	0.0172414	Pseudomonas sp.
139	448.48	0.0172414	Pseudomonas sp.
140	448.48	0.0172414	Pseudomonas sp.
141	448.48	0.0172414	Pseudomonas sp.
142	448.48	0.0172414	Pseudomonas sp.
143	448.48	0.0172414	Pseudomonas sp.
186	448.48	0.0172414	Pseudomonas sp.
193	448.48	0.0172414	Pseudomonas sp.
195	448.48	0.0172414	Pseudomonas sp.
196	448.48	0.0172414	Pseudomonas sp.
197	448.48	0.0172414	Pseudomonas sp.
257	448.48	0.0172414	Pseudomonas sp.
258	448.48	0.0172414	Pseudomonas sp.
259	448.48	0.0172414	Pseudomonas sp.
260	448.48	0.0172414	Pseudomonas sp.
263	448.48	0.0172414	Pseudomonas sp.
265	448.48	0.0172414	Pseudomonas sp.
266	448.48	0.0172414	Pseudomonas sp.
267	448.48	0.0172414	Pseudomonas sp.
268	448.48	0.0172414	Pseudomonas sp.
270	448.48	0.0172414	Pseudomonas sp.
271	448.48	0.0172414	Pseudomonas sp.
272	448.48	0.0172414	Pseudomonas sp.
274	448.48	0.0172414	Pseudomonas sp.
275	448.48	0.0172414	Pseudomonas sp.
276	448.48	0.0172414	Pseudomonas sp.
277	448.48	0.0172414	Pseudomonas sp.
49	657.27	0.0175439	Pseudomonas sp.
50	657.27	0.0175439	Pseudomonas sp.
51	657.27	0.0175439	Pseudomonas sp.
52	657.27	0.0175439	Pseudomonas sp.
53	657.27	0.0175439	Pseudomonas sp.
54	657.27	0.0175439	Pseudomonas sp.
56	657.27	0.0175439	Pseudomonas sp.
57	657.27	0.0175439	Pseudomonas sp.
59	657.27	0.0175439	Pseudomonas sp.
60	657.27	0.0175439	Pseudomonas sp.
64	657.27	0.0175439	Pseudomonas sp.
130	657.27	0.0175439	Pseudomonas sp.
131	657.27	0.0175439	Pseudomonas sp.
132	657.27	0.0175439	Pseudomonas sp.
133	657.27	0.0175439	Pseudomonas sp.
134	657.27	0.0175439	Pseudomonas sp.
135	657.27	0.0175439	Pseudomonas sp.
136	657.27	0.0175439	Pseudomonas sp.
138	657.27	0.0175439	Pseudomonas sp.
139	657.27	0.0175439	Pseudomonas sp.
140	657.27	0.0175439	Pseudomonas sp.
141	657.27	0.0175439	Pseudomonas sp.
142	657.27	0.0175439	Pseudomonas sp.
143	657.27	0.0175439	Pseudomonas sp.
144	657.27	0.0175439	Pseudomonas sp.
186	657.27	0.0175439	Pseudomonas sp.
188	657.27	0.0175439	Pseudomonas sp.
193	657.27	0.0175439	Pseudomonas sp.
195	657.27	0.0175439	Pseudomonas sp.
196	657.27	0.0175439	Pseudomonas sp.
197	657.27	0.0175439	Pseudomonas sp.
198	657.27	0.0175439	Pseudomonas sp.
256	657.27	0.0175439	Pseudomonas sp.
257	657.27	0.0175439	Pseudomonas sp.
258	657.27	0.0175439	Pseudomonas sp.
259	657.27	0.0175439	Pseudomonas sp.
260	657.27	0.0175439	Pseudomonas sp.
261	657.27	0.0175439	Pseudomonas sp.
263	657.27	0.0175439	Pseudomonas sp.
265	657.27	0.0175439	Pseudomonas sp.
266	657.27	0.0175439	Pseudomonas sp.
267	657.27	0.0175439	Pseudomonas sp.
268	657.27	0.0175439	Pseudomonas sp.
270	657.27	0.0175439	Pseudomonas sp.
271	657.27	0.0175439	Pseudomonas sp.
272	657.27	0.0175439	Pseudomonas sp.
274	657.27	0.0175439	Pseudomonas sp.
276	657.27	0.0175439	Pseudomonas sp.
277	657.27	0.0175439	Pseudomonas sp.
49	843.25	0.0175439	Pseudomonas sp.
52	843.25	0.0175439	Pseudomonas sp.
53	843.25	0.0175439	Pseudomonas sp.
54	843.25	0.0175439	Pseudomonas sp.
56	843.25	0.0175439	Pseudomonas sp.
57	843.25	0.0175439	Pseudomonas sp.
58	843.25	0.0175439	Pseudomonas sp.
59	843.25	0.0175439	Pseudomonas sp.
60	843.25	0.0175439	Pseudomonas sp.
64	843.25	0.0175439	Pseudomonas sp.
129	843.25	0.0175439	Pseudomonas sp.
130	843.25	0.0175439	Pseudomonas sp.
131	843.25	0.0175439	Pseudomonas sp.
132	843.25	0.0175439	Pseudomonas sp.
135	843.25	0.0175439	Pseudomonas sp.
137	843.25	0.0175439	Pseudomonas sp.
138	843.25	0.0175439	Pseudomonas sp.
140	843.25	0.0175439	Pseudomonas sp.
141	843.25	0.0175439	Pseudomonas sp.
142	843.25	0.0175439	Pseudomonas sp.
143	843.25	0.0175439	Pseudomonas sp.
144	843.25	0.0175439	Pseudomonas sp.
186	843.25	0.0175439	Pseudomonas sp.
188	843.25	0.0175439	Pseudomonas sp.
193	843.25	0.0175439	Pseudomonas sp.
195	843.25	0.0175439	Pseudomonas sp.
196	843.25	0.0175439	Pseudomonas sp.
198	843.25	0.0175439	Pseudomonas sp.
256	843.25	0.0175439	Pseudomonas sp.
257	843.25	0.0175439	Pseudomonas sp.
258	843.25	0.0175439	Pseudomonas sp.
259	843.25	0.0175439	Pseudomonas sp.
260	843.25	0.0175439	Pseudomonas sp.
261	843.25	0.0175439	Pseudomonas sp.
263	843.25	0.0175439	Pseudomonas sp.
265	843.25	0.0175439	Pseudomonas sp.
266	843.25	0.0175439	Pseudomonas sp.
268	843.25	0.0175439	Pseudomonas sp.
269	843.25	0.0175439	Pseudomonas sp.
270	843.25	0.0175439	Pseudomonas sp.
271	843.25	0.0175439	Pseudomonas sp.
272	843.25	0.0175439	Pseudomonas sp.
274	843.25	0.0175439	Pseudomonas sp.
275	843.25	0.0175439	Pseudomonas sp.
277	843.25	0.0175439	Pseudomonas sp.
49	255.17	0.0178571	Pseudomonas sp.
50	255.17	0.0178571	Pseudomonas sp.
52	255.17	0.0178571	Pseudomonas sp.
53	255.17	0.0178571	Pseudomonas sp.
54	255.17	0.0178571	Pseudomonas sp.
56	255.17	0.0178571	Pseudomonas sp.
57	255.17	0.0178571	Pseudomonas sp.
58	255.17	0.0178571	Pseudomonas sp.
59	255.17	0.0178571	Pseudomonas sp.
60	255.17	0.0178571	Pseudomonas sp.
64	255.17	0.0178571	Pseudomonas sp.
132	255.17	0.0178571	Pseudomonas sp.
135	255.17	0.0178571	Pseudomonas sp.
137	255.17	0.0178571	Pseudomonas sp.
138	255.17	0.0178571	Pseudomonas sp.
139	255.17	0.0178571	Pseudomonas sp.
140	255.17	0.0178571	Pseudomonas sp.
141	255.17	0.0178571	Pseudomonas sp.
142	255.17	0.0178571	Pseudomonas sp.
143	255.17	0.0178571	Pseudomonas sp.
144	255.17	0.0178571	Pseudomonas sp.
186	255.17	0.0178571	Pseudomonas sp.
188	255.17	0.0178571	Pseudomonas sp.
195	255.17	0.0178571	Pseudomonas sp.
196	255.17	0.0178571	Pseudomonas sp.
197	255.17	0.0178571	Pseudomonas sp.
198	255.17	0.0178571	Pseudomonas sp.
256	255.17	0.0178571	Pseudomonas sp.
257	255.17	0.0178571	Pseudomonas sp.
258	255.17	0.0178571	Pseudomonas sp.
259	255.17	0.0178571	Pseudomonas sp.
260	255.17	0.0178571	Pseudomonas sp.
261	255.17	0.0178571	Pseudomonas sp.
263	255.17	0.0178571	Pseudomonas sp.
265	255.17	0.0178571	Pseudomonas sp.
266	255.17	0.0178571	Pseudomonas sp.
267	255.17	0.0178571	Pseudomonas sp.
268	255.17	0.0178571	Pseudomonas sp.
270	255.17	0.0178571	Pseudomonas sp.
271	255.17	0.0178571	Pseudomonas sp.
272	255.17	0.0178571	Pseudomonas sp.
274	255.17	0.0178571	Pseudomonas sp.
276	255.17	0.0178571	Pseudomonas sp.
277	255.17	0.0178571	Pseudomonas sp.
49	750.42	0.0188679	Pseudomonas sp.
50	750.42	0.0188679	Pseudomonas sp.
51	750.42	0.0188679	Pseudomonas sp.
52	750.42	0.0188679	Pseudomonas sp.
53	750.42	0.0188679	Pseudomonas sp.
54	750.42	0.0188679	Pseudomonas sp.
57	750.42	0.0188679	Pseudomonas sp.
58	750.42	0.0188679	Pseudomonas sp.
59	750.42	0.0188679	Pseudomonas sp.
60	750.42	0.0188679	Pseudomonas sp.
64	750.42	0.0188679	Pseudomonas sp.
129	750.42	0.0188679	Pseudomonas sp.
130	750.42	0.0188679	Pseudomonas sp.
131	750.42	0.0188679	Pseudomonas sp.
132	750.42	0.0188679	Pseudomonas sp.
133	750.42	0.0188679	Pseudomonas sp.
134	750.42	0.0188679	Pseudomonas sp.
135	750.42	0.0188679	Pseudomonas sp.
136	750.42	0.0188679	Pseudomonas sp.
138	750.42	0.0188679	Pseudomonas sp.
139	750.42	0.0188679	Pseudomonas sp.
140	750.42	0.0188679	Pseudomonas sp.
141	750.42	0.0188679	Pseudomonas sp.
142	750.42	0.0188679	Pseudomonas sp.
143	750.42	0.0188679	Pseudomonas sp.
144	750.42	0.0188679	Pseudomonas sp.
188	750.42	0.0188679	Pseudomonas sp.
193	750.42	0.0188679	Pseudomonas sp.
196	750.42	0.0188679	Pseudomonas sp.
197	750.42	0.0188679	Pseudomonas sp.
256	750.42	0.0188679	Pseudomonas sp.
258	750.42	0.0188679	Pseudomonas sp.
259	750.42	0.0188679	Pseudomonas sp.
263	750.42	0.0188679	Pseudomonas sp.
268	750.42	0.0188679	Pseudomonas sp.
269	750.42	0.0188679	Pseudomonas sp.
270	750.42	0.0188679	Pseudomonas sp.
272	750.42	0.0188679	Pseudomonas sp.
273	750.42	0.0188679	Pseudomonas sp.
274	750.42	0.0188679	Pseudomonas sp.
275	750.42	0.0188679	Pseudomonas sp.
276	750.42	0.0188679	Pseudomonas sp.
277	750.42	0.0188679	Pseudomonas sp.
49	526.9	0.0192308	Pseudomonas sp.
50	526.9	0.0192308	Pseudomonas sp.
51	526.9	0.0192308	Pseudomonas sp.
52	526.9	0.0192308	Pseudomonas sp.
53	526.9	0.0192308	Pseudomonas sp.
54	526.9	0.0192308	Pseudomonas sp.
56	526.9	0.0192308	Pseudomonas sp.
59	526.9	0.0192308	Pseudomonas sp.
60	526.9	0.0192308	Pseudomonas sp.
64	526.9	0.0192308	Pseudomonas sp.
129	526.9	0.0192308	Pseudomonas sp.
130	526.9	0.0192308	Pseudomonas sp.
131	526.9	0.0192308	Pseudomonas sp.
132	526.9	0.0192308	Pseudomonas sp.
133	526.9	0.0192308	Pseudomonas sp.
134	526.9	0.0192308	Pseudomonas sp.
135	526.9	0.0192308	Pseudomonas sp.
136	526.9	0.0192308	Pseudomonas sp.
138	526.9	0.0192308	Pseudomonas sp.
139	526.9	0.0192308	Pseudomonas sp.
140	526.9	0.0192308	Pseudomonas sp.
141	526.9	0.0192308	Pseudomonas sp.
142	526.9	0.0192308	Pseudomonas sp.
143	526.9	0.0192308	Pseudomonas sp.
186	526.9	0.0192308	Pseudomonas sp.
193	526.9	0.0192308	Pseudomonas sp.
195	526.9	0.0192308	Pseudomonas sp.
196	526.9	0.0192308	Pseudomonas sp.
197	526.9	0.0192308	Pseudomonas sp.
259	526.9	0.0192308	Pseudomonas sp.
265	526.9	0.0192308	Pseudomonas sp.
266	526.9	0.0192308	Pseudomonas sp.
267	526.9	0.0192308	Pseudomonas sp.
268	526.9	0.0192308	Pseudomonas sp.
270	526.9	0.0192308	Pseudomonas sp.
271	526.9	0.0192308	Pseudomonas sp.
272	526.9	0.0192308	Pseudomonas sp.
273	526.9	0.0192308	Pseudomonas sp.
274	526.9	0.0192308	Pseudomonas sp.
275	526.9	0.0192308	Pseudomonas sp.
276	526.9	0.0192308	Pseudomonas sp.
277	526.9	0.0192308	Pseudomonas sp.
49	656.27	0.0192308	Pseudomonas sp.
50	656.27	0.0192308	Pseudomonas sp.
51	656.27	0.0192308	Pseudomonas sp.
52	656.27	0.0192308	Pseudomonas sp.
53	656.27	0.0192308	Pseudomonas sp.
54	656.27	0.0192308	Pseudomonas sp.
56	656.27	0.0192308	Pseudomonas sp.
59	656.27	0.0192308	Pseudomonas sp.
60	656.27	0.0192308	Pseudomonas sp.
64	656.27	0.0192308	Pseudomonas sp.
129	656.27	0.0192308	Pseudomonas sp.
130	656.27	0.0192308	Pseudomonas sp.
131	656.27	0.0192308	Pseudomonas sp.
132	656.27	0.0192308	Pseudomonas sp.
133	656.27	0.0192308	Pseudomonas sp.
134	656.27	0.0192308	Pseudomonas sp.
135	656.27	0.0192308	Pseudomonas sp.
136	656.27	0.0192308	Pseudomonas sp.
137	656.27	0.0192308	Pseudomonas sp.
138	656.27	0.0192308	Pseudomonas sp.
139	656.27	0.0192308	Pseudomonas sp.
140	656.27	0.0192308	Pseudomonas sp.
141	656.27	0.0192308	Pseudomonas sp.
142	656.27	0.0192308	Pseudomonas sp.
143	656.27	0.0192308	Pseudomonas sp.
144	656.27	0.0192308	Pseudomonas sp.
186	656.27	0.0192308	Pseudomonas sp.
193	656.27	0.0192308	Pseudomonas sp.
196	656.27	0.0192308	Pseudomonas sp.
197	656.27	0.0192308	Pseudomonas sp.
198	656.27	0.0192308	Pseudomonas sp.
257	656.27	0.0192308	Pseudomonas sp.
259	656.27	0.0192308	Pseudomonas sp.
263	656.27	0.0192308	Pseudomonas sp.
265	656.27	0.0192308	Pseudomonas sp.
266	656.27	0.0192308	Pseudomonas sp.
267	656.27	0.0192308	Pseudomonas sp.
268	656.27	0.0192308	Pseudomonas sp.
270	656.27	0.0192308	Pseudomonas sp.
271	656.27	0.0192308	Pseudomonas sp.
272	656.27	0.0192308	Pseudomonas sp.
274	656.27	0.0192308	Pseudomonas sp.
275	656.27	0.0192308	Pseudomonas sp.
276	656.27	0.0192308	Pseudomonas sp.
277	656.27	0.0192308	Pseudomonas sp.
49	671.25	0.0192308	Pseudomonas sp.
50	671.25	0.0192308	Pseudomonas sp.
51	671.25	0.0192308	Pseudomonas sp.
52	671.25	0.0192308	Pseudomonas sp.
53	671.25	0.0192308	Pseudomonas sp.
54	671.25	0.0192308	Pseudomonas sp.
56	671.25	0.0192308	Pseudomonas sp.
57	671.25	0.0192308	Pseudomonas sp.
58	671.25	0.0192308	Pseudomonas sp.
59	671.25	0.0192308	Pseudomonas sp.
60	671.25	0.0192308	Pseudomonas sp.
64	671.25	0.0192308	Pseudomonas sp.
131	671.25	0.0192308	Pseudomonas sp.
132	671.25	0.0192308	Pseudomonas sp.
135	671.25	0.0192308	Pseudomonas sp.
136	671.25	0.0192308	Pseudomonas sp.
137	671.25	0.0192308	Pseudomonas sp.
138	671.25	0.0192308	Pseudomonas sp.
139	671.25	0.0192308	Pseudomonas sp.
140	671.25	0.0192308	Pseudomonas sp.
141	671.25	0.0192308	Pseudomonas sp.
142	671.25	0.0192308	Pseudomonas sp.
143	671.25	0.0192308	Pseudomonas sp.
144	671.25	0.0192308	Pseudomonas sp.
186	671.25	0.0192308	Pseudomonas sp.
188	671.25	0.0192308	Pseudomonas sp.
193	671.25	0.0192308	Pseudomonas sp.
195	671.25	0.0192308	Pseudomonas sp.
196	671.25	0.0192308	Pseudomonas sp.
198	671.25	0.0192308	Pseudomonas sp.
256	671.25	0.0192308	Pseudomonas sp.
257	671.25	0.0192308	Pseudomonas sp.
258	671.25	0.0192308	Pseudomonas sp.
259	671.25	0.0192308	Pseudomonas sp.
260	671.25	0.0192308	Pseudomonas sp.
261	671.25	0.0192308	Pseudomonas sp.
263	671.25	0.0192308	Pseudomonas sp.
265	671.25	0.0192308	Pseudomonas sp.
266	671.25	0.0192308	Pseudomonas sp.
267	671.25	0.0192308	Pseudomonas sp.
271	671.25	0.0192308	Pseudomonas sp.
272	671.25	0.0192308	Pseudomonas sp.
274	671.25	0.0192308	Pseudomonas sp.
276	671.25	0.0192308	Pseudomonas sp.
49	549.48	0.0196078	Pseudomonas sp.
50	549.48	0.0196078	Pseudomonas sp.
51	549.48	0.0196078	Pseudomonas sp.
53	549.48	0.0196078	Pseudomonas sp.
56	549.48	0.0196078	Pseudomonas sp.
58	549.48	0.0196078	Pseudomonas sp.
60	549.48	0.0196078	Pseudomonas sp.
64	549.48	0.0196078	Pseudomonas sp.
129	549.48	0.0196078	Pseudomonas sp.
130	549.48	0.0196078	Pseudomonas sp.
131	549.48	0.0196078	Pseudomonas sp.
132	549.48	0.0196078	Pseudomonas sp.
133	549.48	0.0196078	Pseudomonas sp.
134	549.48	0.0196078	Pseudomonas sp.
135	549.48	0.0196078	Pseudomonas sp.
136	549.48	0.0196078	Pseudomonas sp.
138	549.48	0.0196078	Pseudomonas sp.
139	549.48	0.0196078	Pseudomonas sp.
140	549.48	0.0196078	Pseudomonas sp.
141	549.48	0.0196078	Pseudomonas sp.
142	549.48	0.0196078	Pseudomonas sp.
143	549.48	0.0196078	Pseudomonas sp.
188	549.48	0.0196078	Pseudomonas sp.
193	549.48	0.0196078	Pseudomonas sp.
197	549.48	0.0196078	Pseudomonas sp.
256	549.48	0.0196078	Pseudomonas sp.
257	549.48	0.0196078	Pseudomonas sp.
258	549.48	0.0196078	Pseudomonas sp.
259	549.48	0.0196078	Pseudomonas sp.
260	549.48	0.0196078	Pseudomonas sp.
261	549.48	0.0196078	Pseudomonas sp.
263	549.48	0.0196078	Pseudomonas sp.
267	549.48	0.0196078	Pseudomonas sp.
268	549.48	0.0196078	Pseudomonas sp.
269	549.48	0.0196078	Pseudomonas sp.
270	549.48	0.0196078	Pseudomonas sp.
273	549.48	0.0196078	Pseudomonas sp.
275	549.48	0.0196078	Pseudomonas sp.
276	549.48	0.0196078	Pseudomonas sp.
277	549.48	0.0196078	Pseudomonas sp.
49	542.08	0.02	Pseudomonas sp.
50	542.08	0.02	Pseudomonas sp.
51	542.08	0.02	Pseudomonas sp.
52	542.08	0.02	Pseudomonas sp.
53	542.08	0.02	Pseudomonas sp.
54	542.08	0.02	Pseudomonas sp.
56	542.08	0.02	Pseudomonas sp.
59	542.08	0.02	Pseudomonas sp.
60	542.08	0.02	Pseudomonas sp.
64	542.08	0.02	Pseudomonas sp.
129	542.08	0.02	Pseudomonas sp.
130	542.08	0.02	Pseudomonas sp.
131	542.08	0.02	Pseudomonas sp.
132	542.08	0.02	Pseudomonas sp.
133	542.08	0.02	Pseudomonas sp.
134	542.08	0.02	Pseudomonas sp.
135	542.08	0.02	Pseudomonas sp.
136	542.08	0.02	Pseudomonas sp.
138	542.08	0.02	Pseudomonas sp.
139	542.08	0.02	Pseudomonas sp.
140	542.08	0.02	Pseudomonas sp.
141	542.08	0.02	Pseudomonas sp.
142	542.08	0.02	Pseudomonas sp.
143	542.08	0.02	Pseudomonas sp.
186	542.08	0.02	Pseudomonas sp.
193	542.08	0.02	Pseudomonas sp.
195	542.08	0.02	Pseudomonas sp.
196	542.08	0.02	Pseudomonas sp.
197	542.08	0.02	Pseudomonas sp.
259	542.08	0.02	Pseudomonas sp.
265	542.08	0.02	Pseudomonas sp.
266	542.08	0.02	Pseudomonas sp.
267	542.08	0.02	Pseudomonas sp.
268	542.08	0.02	Pseudomonas sp.
270	542.08	0.02	Pseudomonas sp.
271	542.08	0.02	Pseudomonas sp.
272	542.08	0.02	Pseudomonas sp.
274	542.08	0.02	Pseudomonas sp.
275	542.08	0.02	Pseudomonas sp.
276	542.08	0.02	Pseudomonas sp.
277	542.08	0.02	Pseudomonas sp.
51	616.16	0.02	Pseudomonas sp.
53	616.16	0.02	Pseudomonas sp.
54	616.16	0.02	Pseudomonas sp.
59	616.16	0.02	Pseudomonas sp.
60	616.16	0.02	Pseudomonas sp.
64	616.16	0.02	Pseudomonas sp.
129	616.16	0.02	Pseudomonas sp.
130	616.16	0.02	Pseudomonas sp.
131	616.16	0.02	Pseudomonas sp.
132	616.16	0.02	Pseudomonas sp.
135	616.16	0.02	Pseudomonas sp.
136	616.16	0.02	Pseudomonas sp.
138	616.16	0.02	Pseudomonas sp.
139	616.16	0.02	Pseudomonas sp.
140	616.16	0.02	Pseudomonas sp.
141	616.16	0.02	Pseudomonas sp.
142	616.16	0.02	Pseudomonas sp.
143	616.16	0.02	Pseudomonas sp.
144	616.16	0.02	Pseudomonas sp.
186	616.16	0.02	Pseudomonas sp.
188	616.16	0.02	Pseudomonas sp.
193	616.16	0.02	Pseudomonas sp.
195	616.16	0.02	Pseudomonas sp.
196	616.16	0.02	Pseudomonas sp.
198	616.16	0.02	Pseudomonas sp.
256	616.16	0.02	Pseudomonas sp.
257	616.16	0.02	Pseudomonas sp.
258	616.16	0.02	Pseudomonas sp.
259	616.16	0.02	Pseudomonas sp.
260	616.16	0.02	Pseudomonas sp.
261	616.16	0.02	Pseudomonas sp.
263	616.16	0.02	Pseudomonas sp.
265	616.16	0.02	Pseudomonas sp.
266	616.16	0.02	Pseudomonas sp.
267	616.16	0.02	Pseudomonas sp.
270	616.16	0.02	Pseudomonas sp.
271	616.16	0.02	Pseudomonas sp.
272	616.16	0.02	Pseudomonas sp.
274	616.16	0.02	Pseudomonas sp.
276	616.16	0.02	Pseudomonas sp.
277	616.16	0.02	Pseudomonas sp.
[truncated: 7,247 more rows]
